# Supplementary material for: NVL-655 Is a Selective and Brain-Penetrant Inhibitor of Diverse ALK-Mutant Oncoproteins, Including Lorlatinib-Resistant Compound Mutations
Source: PubMed Central journal article supplement — Cancer Discov. 2024 Sep 13;14(12):2367–86. doi: 10.1158/2159-8290.CD-24-0231 (PMC11609626; doi:10.1158/2159-8290.cd-24-0231), 2024-09-13
Supplement: cd-24-0231_supplementary_figures_s1-s17_suppsf1.pdf [file cd-24-0231_supplementary_figures_s1-s17_suppsf1.pdf]

## Supplementary Information

Supplementary Figures S1-S17

### **NVL-655 Is a Selective and Brain-Penetrant Inhibitor of Diverse ALK Mutant Oncoproteins, Including Lorlatinib-Resistant Compound Mutations**

Jessica J. Lin<sup>1\*</sup>, Joshua C. Horan<sup>2\*</sup>, Anupong Tangpeerachaikul<sup>2\*</sup>, Aurélie Swalduz<sup>3</sup>, Augusto Valdivia<sup>4</sup>, Melissa L. Johnson<sup>5</sup>, Benjamin Besse<sup>6</sup>, D. Ross Camidge<sup>7</sup>, Toshio Fujino<sup>1</sup>, Satoshi Yoda<sup>1</sup>, Linh Nguyen-Phuong<sup>1</sup>, Hayato Mizuta<sup>6</sup>, Ludovic Bigot<sup>6</sup>, Catline Nobre<sup>6</sup>, Jii Bum Lee<sup>8</sup>, Mi Ra Yu<sup>8</sup>, Scot Mente<sup>2</sup>, Yuting Sun<sup>2</sup>, Nancy E. Kohl<sup>9</sup>, James R. Porter<sup>2</sup>, Matthew D. Shair<sup>2</sup>, Viola W. Zhu<sup>2</sup>, Enriqueta Felip<sup>4</sup>, Byoung Chul Cho<sup>8</sup>, Luc Friboulet<sup>6</sup>, Aaron N. Hata<sup>1</sup>, Henry E. Pelish<sup>2^</sup>, Alexander Drilon<sup>10^</sup>

<sup>1</sup> Massachusetts General Hospital Cancer Center, Boston, MA, USA

<sup>2</sup> Nuvalent, Inc., Cambridge, MA, USA

<sup>3</sup> Centre Léon Bérard, Lyon, France

<sup>4</sup> Vall d'Hebron University Hospital and Vall d'Hebron Institute of Oncology, Barcelona, Spain

<sup>5</sup> Sarah Cannon Research Institute, Nashville, TN, USA

<sup>6</sup> Paris-Saclay University, Gustave Roussy Cancer Center, Villejuif

<sup>7</sup> University of Colorado, Anschutz Medical Campus, Aurora, CO, USA

<sup>8</sup> Yonsei University College of Medicine, Seoul, Republic of Korea

<sup>9</sup> Kohl Consulting, Wellesley, MA, USA

<sup>10</sup> Memorial Sloan Kettering Cancer Center and Weill Cornell Medical College, New York, NY, USA

(\* Equal Contributor, ^ Corresponding Author)

**A**

|                                       |                                                |
|---------------------------------------|------------------------------------------------|
| Ligand                                | NVL-655                                        |
| X-ray source                          | PXII/X10SA (SLS)                               |
| Wavelength [Å]                        | 1.0000                                         |
| Detector                              | EIGER                                          |
| Temperature [K]                       | 100                                            |
| Space group                           | P 2 <sub>1</sub> 2 <sub>1</sub> 2 <sub>1</sub> |
| Cell: a; b; c; [Å]                    | 51.52; 57.20; 105.23                           |
| α; β; γ; [°]                          | 90.0; 90.0; 90.0                               |
| Resolution [Å]                        | 1.58 (1.61-1.58)                               |
| Unique reflections                    | 43503 (2140)                                   |
| Multiplicity                          | 7.3 (6.9)                                      |
| Completeness [%]                      | 99.9 (100.0)                                   |
| R <sub>pim</sub> [%]                  | 2.1 (53.4)                                     |
| R <sub>sym</sub> [%]                  | 5.3 (131.9)                                    |
| R <sub>meas</sub> [%]                 | 5.7 (142.5)                                    |
| CC1/2 [%]                             | 99.90 (75.10)                                  |
| Mean(I)/sd                            | 14.6 (1.3)                                     |
| <b>Refinement</b>                     |                                                |
| Resolution [Å]                        | 52.61 - 1.58                                   |
| Number of reflections (working /test) | 39564 / 3937                                   |
| R <sub>cryst</sub> [%]                | 18.3                                           |
| R <sub>free</sub> [%]                 | 22.4                                           |
| Total number of atoms:                |                                                |
| Protein                               | 2539                                           |
| Water                                 | 211                                            |
| Ligand                                | 32                                             |
| Deviation from ideal geometry:        |                                                |
| Bond lengths [Å]                      | 0.006                                          |
| Bond angles [°]                       | 1.455                                          |
| Ramachandran plot                     |                                                |
| Most favoured regions [%]             | 92.2%                                          |

**B**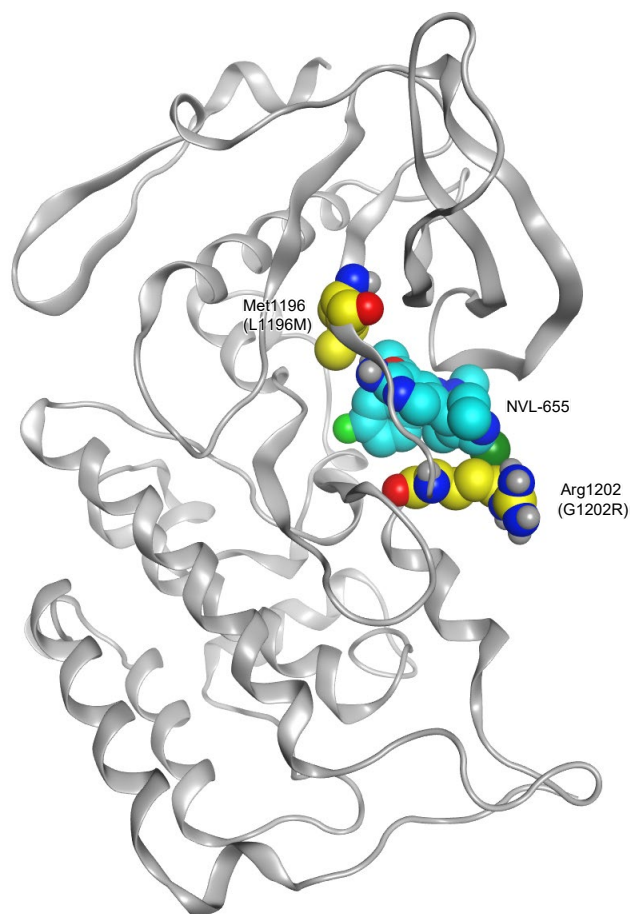**C**

## Properties of NVL-655

|                                 |                                                     |
|---------------------------------|-----------------------------------------------------|
| Chemical formula                | C <sub>23</sub> H <sub>22</sub> ClFN <sub>6</sub> O |
| Molecular weight                | 452.921 g/mol                                       |
| Calculated logD <sub>7.4</sub>  | 4.4                                                 |
| Topological polar surface area  | 83.8 Å <sup>2</sup>                                 |
| Predicted basic pK <sub>a</sub> | 5.7                                                 |
| Number of H-bond donors         | 2                                                   |
| Number of H-bond acceptors      | 7                                                   |
| Number of rotatable bonds       | 1                                                   |

**Supplementary Figure S1. Chemistry/X-ray A**, Data collection and refinement statistics for structure determination of ALK G1202R/L1196M in complex with NVL-655. **B**, Same as Fig. 1B but shown as space-filling model for NVL-655 (cyan) and the mutated residues L1196M and G1202R (yellow). **C**, Properties of NVL-655. Calculator Plugins were used for structure property prediction and calculation, Marvin 19.20.0, 2019, ChemAxon (<http://www.chemaxon.com>): logD7.4, topological polar surface area, and predicted basic pKa.

**A**

## Biochemical Activity

|                                    | Crizotinib               | Ceritinib               | Alectinib               | Brigatinib              | Ensartinib              | Lorlatinib               | Zotizalkib              | NVL-655                 |
|------------------------------------|--------------------------|-------------------------|-------------------------|-------------------------|-------------------------|--------------------------|-------------------------|-------------------------|
| IC <sub>50</sub> ALK wild-type     | 11 nM<br>x/+ 1.6 (n=6)   | 1.8 nM<br>x/+ 1.4 (n=5) | 2.9 nM<br>x/+ 2.1 (n=8) | 2.9 nM<br>x/+ 2.9 (n=8) | 0.9 nM<br>x/+ 1.5 (n=4) | 1.0 nM<br>x/+ 1.7 (n=7)  | 0.8 nM<br>x/+ 2.0 (n=5) | 0.9 nM<br>x/+ 1.7 (n=5) |
| IC <sub>50</sub> ALK G1202R/L1196M | 2893 nM<br>x/+ 1.3 (n=5) | 202 nM<br>x/+ 1.7 (n=5) | > 1100 nM<br>(n=6)      | 102 nM<br>x/+ 1.5 (n=6) | 948 nM<br>x/+ 1.9 (n=7) | 487 nM<br>x/+ 1.5 (n=11) | 1.5 nM<br>x/+ 1.3 (n=4) | 1.8 nM<br>x/+ 1.6 (n=7) |

**B**Biochemical Activity  
Relative to NVL-655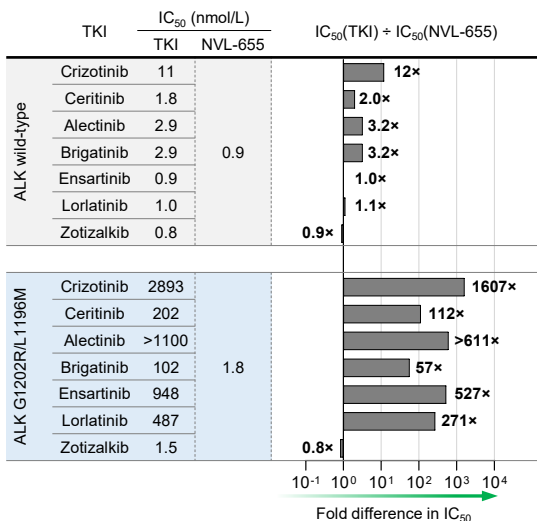**D**Biochemical Potency Change  
Due to G1202R/L1196M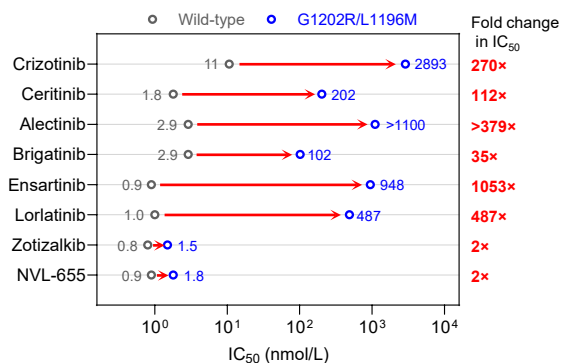**C**

## Biochemical Potency

ALK with single amino acid mutation (substitution or insertion)

| IC <sub>50</sub> (nM) | Crizotinib        | Ceritinib         | Alectinib         | Brigatinib        | Ensartinib        | Lorlatinib        | Zotizalkib        | NVL-655            |
|-----------------------|-------------------|-------------------|-------------------|-------------------|-------------------|-------------------|-------------------|--------------------|
| ALK T1151insT         | ND                | ND                | 6.9 (n=1)         | ND                | ND                | 1.6 x/+ 3.1 (n=3) | ND                | 1.5 x/+ 2.0 (n=3)  |
| ALK T1151M            | 18 x/+ 1.4 (n=2)  | 3.6 x/+ 2.0 (n=2) | 6.8 x/+ 1.5 (n=2) | 4.1 x/+ 1.2 (n=2) | 2.1 x/+ 1.2 (n=2) | 2.4 x/+ 1.3 (n=4) | 3.5 x/+ 1.3 (n=2) | 1.5 x/+ 1.2 (n=4)  |
| ALK L1152R            | ND                | ND                | ND                | ND                | ND                | 4.7 x/+ 1.2 (n=2) | ND                | 2.5 x/+ 1.1 (n=2)  |
| ALK C1156Y            | ND                | ND                | 5.8 (n=1)         | ND                | ND                | 0.7 x/+ 2.8 (n=3) | ND                | 1.0 x/+ 1.8 (n=3)  |
| ALK I1171N            | ND                | ND                | 51 x/+ 1.1 (n=2)  | 27 x/+ 1.2 (n=2)  | ND                | 18 x/+ 1.6 (n=2)  | ND                | 3.4 x/+ 1.7 (n=2)  |
| ALK I1171S            | ND                | ND                | 31 x/+ 1.0 (n=2)  | 21 x/+ 1.1 (n=2)  | ND                | 18 x/+ 1.1 (n=2)  | ND                | 2.3 x/+ 1.1 (n=2)  |
| ALK I1171T            | ND                | ND                | 21 x/+ 1.1 (n=2)  | 1.8 x/+ 1.1 (n=2) | ND                | 16 x/+ 1.1 (n=2)  | ND                | 3.6 x/+ 1.1 (n=2)  |
| ALK F1174L            | 44 x/+ 1.1 (n=2)  | 4.2 x/+ 1.3 (n=2) | 21 x/+ 1.7 (n=3)  | 11 x/+ 2.2 (n=3)  | 17 x/+ 1.0 (n=2)  | 2.3 x/+ 2.9 (n=6) | 33 x/+ 1.6 (n=2)  | 1.1 x/+ 1.6 (n=5)  |
| ALK F1174S            | 34 x/+ 1.2 (n=2)  | 8.9 x/+ 1.9 (n=2) | 53 x/+ 1.3 (n=2)  | 5.2 x/+ 1.2 (n=2) | 12 x/+ 1.3 (n=2)  | 3.8 x/+ 1.0 (n=2) | 38 x/+ 1.3 (n=2)  | 1.1 x/+ 1.2 (n=2)  |
| ALK V1180L            | ND                | ND                | 60 x/+ 1.0 (n=2)  | 0.7 x/+ 1.1 (n=2) | ND                | 2.6 x/+ 1.1 (n=2) | ND                | 0.87 x/+ 1.2 (n=2) |
| ALK L1196M            | 210 x/+ 1.1 (n=2) | 1.5 x/+ 1.4 (n=2) | 26 x/+ 1.1 (n=3)  | 11 x/+ 1.6 (n=2)  | ND                | 20 x/+ 1.3 (n=2)  | 7.0 x/+ 1.0 (n=2) | 11 x/+ 2.0 (n=3)   |
| ALK L1198F            | ND                | ND                | 24 x/+ 1.5 (n=2)  | 64 x/+ 1.2 (n=2)  | ND                | 32 x/+ 1.1 (n=2)  | ND                | 0.91 x/+ 1.4 (n=4) |
| ALK G1202R            | 351 x/+ 1.2 (n=2) | 110 x/+ 1.1 (n=2) | 724 x/+ 1.1 (n=2) | 137 x/+ 1.4 (n=2) | 674 x/+ 1.1 (n=2) | 51 x/+ 1.2 (n=5)  | 6.2 x/+ 1.4 (n=2) | 0.9 x/+ 1.5 (n=3)  |
| ALK D1203N            | ND                | ND                | 15 x/+ 1.1 (n=2)  | 13 x/+ 1.1 (n=2)  | ND                | 15 x/+ 1.4 (n=2)  | ND                | 6.8 x/+ 1.3 (n=2)  |
| ALK S1206R            | ND                | ND                | 29 (n=1)          | ND                | ND                | 1.4 x/+ 2.1 (n=3) | ND                | 1.8 x/+ 1.8 (n=3)  |
| ALK G1269A            | ND                | ND                | 27 (n=1)          | ND                | ND                | 7.8 x/+ 2.0 (n=3) | ND                | 16 x/+ 1.6 (n=3)   |
| ALK G1269S            | ND                | ND                | 46 (n=1)          | ND                | ND                | 67 x/+ 2.5 (n=3)  | ND                | 79 x/+ 1.2 (n=3)   |
| ALK R1275Q            | 17 x/+ 1.0 (n=2)  | 1.2 x/+ 1.1 (n=2) | 25 x/+ 1.1 (n=2)  | 8.0 x/+ 2.0 (n=2) | 3.1 x/+ 1.2 (n=2) | 1.8 x/+ 1.3 (n=2) | 7.3 x/+ 1.1 (n=2) | 0.8 x/+ 1.5 (n=2)  |

**Supplementary Figure S2. Biochemical activity of ALK TKIs.** **A**, Biochemical activity against ALK and ALK G1202R/L1196M. Geometric mean x/+ standard deviation (number of repeats) is shown. **B**, Potency of 7 TKIs relative to NVL-655, calculated by dividing IC<sub>50</sub>(TKI) by IC<sub>50</sub>(NVL-655) in each row. IC<sub>50</sub> values are from Panel A. "Relative potency >" is treated as "relative potency =" for graph plotting. **C**, Activity against ALK containing single amino acid substitution or insertion, shown as geometric mean x/+ standard deviation (number of repeats). ND, not determined. **D**, Plot showing the IC<sub>50</sub> of each TKI against ALK (gray) and ALK G1202R/L1196M (blue) taken from Panel A, along with the associated fold change in IC<sub>50</sub>. Red indicates an increase in IC<sub>50</sub>. "IC<sub>50</sub> >" is treated as "IC<sub>50</sub> =" for plotting.

**A**

335 Kinases in the Kinome Panel

|            |                |         |            |                  |            |           |        |
|------------|----------------|---------|------------|------------------|------------|-----------|--------|
| ABL1       | CDK1/CycE1     | CSK     | FGR        | MAP3K10          | NEK2       | PKMzeta   | STK17A |
| ABL2       | CDK12/CycK     | DAPK1   | FLT3       | MAP3K11          | NEK3       | PKN3      | STK23  |
| ACK1       | CDK13/CycK     | DAPK2   | FRK        | MAP3K7/MAP3K7IP1 | NEK4       | PLK1      | STK25  |
| ACVR1      | CDK16/CycY     | DAPK3   | FYN        | MAP3K9           | NEK6       | PLK3      | STK33  |
| ACVR1B     | CDK17/p35NCK   | DCAMKL2 | GRK2       | MAP4K2           | NEK7       | PRK1      | STK39  |
| ACVR2A     | CDK18/CycY     | DDR2    | GRK3       | MAP4K4           | NEK9       | PRK2      | SYK    |
| ACVR2B     | CDK19/CycC     | DMPK    | GRK4       | MAP4K5           | NIK        | PRKD2     | TAOK2  |
| ACVRL1     | CDK2/CycA2     | DNAPK   | GRK5       | MAPKAPK2         | NLK        | PRKG1     | TAOK3  |
| AKT1       | CDK2/CycD1     | DYRK1A  | GRK6       | MAPKAPK3         | p38alpha   | PRKG2     | TBK1   |
| AKT2       | CDK2/CycE1     | DYRK1B  | GRK7       | MAPKAPK5         | p38beta    | PRKX      | TEC    |
| AKT3       | CDK20/CycH     | DYRK2   | GSG2       | MARK1            | p38delta   | PYK2      | TGFBR1 |
| ALK        | CDK20/CycT1    | DYRK3   | GSK3alpha  | MARK2            | p38gamma   | RAF1 YDYD | TGFBR2 |
| AMPKalpha1 | CDK3/CycC      | DYRK4   | GSK3beta   | MARK3            | PAK1       | RET       | TIE2   |
| ARK5       | CDK3/CycE1     | EEF2K   | HCK        | MARK4            | PAK2       | RIPK2     | TLK1   |
| ASK1       | CDK4/CycD1     | EGFR    | HIPK1      | MASTL            | PAK3       | RIPK4     | TLK2   |
| AuroraA    | CDK4/CycD2     | EIF2AK2 | HIPK2      | MATK             | PAK4       | RIPK5     | TNK1   |
| AuroraB    | CDK4/CycD3     | EIF2AK3 | HIPK3      | MEK1             | PAK6       | ROCK1     | TRKA   |
| AuroraC    | CDK5/p25NCK    | EPHA1   | HIPK4      | MEK2             | PAK7       | ROCK2     | TRKB   |
| AXL        | CDK5/p35NCK    | EPHA2   | HRI        | MEK5             | PASK       | RON       | TRKC   |
| BLK        | CDK6/CycD1     | EPHA3   | IGF1R      | MEKK2            | PBK        | ROS       | TSF1   |
| BMPR1A     | CDK6/CycD2     | EPHA4   | IKKalpha   | MEKK3            | PDGFRalpha | RPS6KA1   | TSK2   |
| BMPR1B     | CDK6/CycD3     | EPHA5   | IKKbeta    | MELK             | PDGFRbeta  | RPS6KA2   | TSSK1  |
| BMX        | CDK7/CycH/MAT1 | EPHA6   | IKKepsilon | MERTK            | PDK1       | RPS6KA3   | TTBK1  |
| BRAF       | CDK8/CycC      | EPHA7   | INSR       | MET              | PHKG1      | RPS6KA4   | TTBK2  |
| BRK        | CDK9/CycK      | EPHA8   | INSRR      | MINK1            | PHKG2      | RPS6KA5   | TTK    |
| BRSK1      | CDK9/CycT1     | EPHB1   | IRAK1      | MKK4             | PIM1       | RPS6KA6   | TXK    |
| BRSK2      | CHK1           | EPHB2   | IRAK4      | MKK6 SDTD        | PIM2       | S6K       | TYK2   |
| BTK        | CHK2           | EPHB3   | ITK        | MKK7             | PIM3       | S6Kbeta   | TYRO3  |
| BUB1B      | CK1alpha1      | EPHB4   | JAK1       | MKNK1            | PKA        | SAK       | ULK2   |
| CAMK1D     | CK1delta       | ERBB2   | JAK2       | MKNK2            | PKCalpha   | SGK1      | VEGFR1 |
| CAMK2A     | CK1epsilon     | ERBB4   | JAK3       | MLK4             | PKCbeta1   | SGK2      | VEGFR2 |
| CAMK2B     | CK1gamma1      | ERK1    | JNK1       | MST1             | PKCbeta2   | SGK3      | VEGFR3 |
| CAMK2D     | CK1gamma2      | ERK2    | JNK2       | MST2             | PKCdelta   | SIK1      | VRK1   |
| CAMK2G     | CK1gamma3      | ERK5    | JNK3       | MST3             | PKCepsilon | SIK2      | VRK2   |
| CAMK4      | CK2alpha1      | ERK7    | KIT        | MST4             | PKCeta     | SIK3      | WEE1   |
| CAMKK1     | CK2alpha2      | FAK     | LCK        | MTOR             | PKCgamma   | SLK       | WNK1   |
| CAMKK2     | CLK1           | FER     | LIMK1      | MUSK             | PKCiota    | SNARK     | WNK2   |
| CDC42BPA   | CLK2           | FES     | LIMK2      | MYLK             | PKCmu      | SNK       | WNK3   |
| CDC42BPB   | CLK3           | FGFR1   | LRRK2      | MYLK2            | PKCnu      | SRC       | YES    |
| CDC7/DBF4  | CLK4           | FGFR2   | LTK        | MYLK3            | PKCtheta   | SRMS      | ZAK    |
| CDK1/CycA2 | COT            | FGFR3   | LYN        | NEK1             | PKCzeta    | SRPK1     | ZAP70  |
| CDK1/CycB1 | CSF1R          | FGFR4   | MAP3K1     | NEK11            | PKMYT1     | SRPK2     |        |

**B**

Top 31 Hits from the Screen

| Kinase      | IC <sub>50</sub> (nM) | Selectivity window |                    |
|-------------|-----------------------|--------------------|--------------------|
| ALK         | 2.8                   | 1-fold (baseline)  | ≤ 1-fold           |
| ROS1        | 1.2                   | 0.41-fold          |                    |
| LTK         | 9.0                   | 3.2-fold           | 1-fold to 10-fold  |
| PYK2        | 14                    | 4.8-fold           |                    |
| TRKB        | 18                    | 6.3-fold           |                    |
| FAK         | 21                    | 7.2-fold           | 10-fold to 50-fold |
| SLK         | 44                    | 15-fold            |                    |
| TRKA        | 53                    | 19-fold            |                    |
| FER         | 58                    | 20-fold            |                    |
| MUSK        | 90                    | 32-fold            |                    |
| EPHA6       | 115                   | 40-fold            |                    |
| TRKC        | 138                   | 48-fold            |                    |
| ACK1        | 170                   | 60-fold            |                    |
| INSR        | 190                   | 67-fold            |                    |
| BRK         | 235                   | 83-fold            |                    |
| RIPK5       | 250                   | 88-fold            |                    |
| FES         | 415                   | 146-fold           |                    |
| IGF1R       | 455                   | 160-fold           |                    |
| CSF1R       | 460                   | 162-fold           |                    |
| TIE2        | 460                   | 162-fold           |                    |
| EPHA7       | 475                   | 167-fold           |                    |
| EPHB1       | 485                   | 171-fold           |                    |
| EPHA4       | 510                   | 180-fold           |                    |
| EPHA2       | 525                   | 185-fold           |                    |
| SAK         | 565                   | 199-fold           |                    |
| EPHA5       | 635                   | 224-fold           |                    |
| EPHA1       | 640                   | 225-fold           |                    |
| INSRR       | 655                   | 231-fold           |                    |
| MAP4K5      | 795                   | 280-fold           |                    |
| FRK         | 895                   | 315-fold           |                    |
| IRAK1       | 1025                  | 361-fold           |                    |
| 304 kinases | > 1000                | > 352-fold         |                    |

**Supplementary Figure S3. Kinome profiling of NVL-655.** **A**, Table listing 335 kinases evaluated in this screen (Reaction Biology, Germany). The screen was performed at ATP concentrations near the  $K_m$  of each kinase. **B**, Selectivity window for NVL-655 (=  $IC_{50}$  for each kinase  $\div$   $IC_{50}$  for ALK) of the 31 most strongly inhibited kinases from the screen.

Potency (IC<sub>50</sub>, nmol/L) in Cell Viability Assay

| Cell Name                                                           | Fusion      | Mutation      | Crizotinib                 | Ceritinib                  | Alectinib                       | Brigatinib                 | Ensartinib          | Lorlatinib                    | Zotizakib           | NVL-655                       |
|---------------------------------------------------------------------|-------------|---------------|----------------------------|----------------------------|---------------------------------|----------------------------|---------------------|-------------------------------|---------------------|-------------------------------|
| MGH048-1                                                            | EML4-ALK v1 | —             | 187.8 x/+ 1.1 (n=3)        | 34.6 x/+ 1.3 (n=3)         | 32.5 x/+ 1.3 (n=3)              | 10.9 x/+ 1.7 (n=3)         | ND                  | 2.2 x/+ 1.3 (n=3)             | ND                  | 0.8 x/+ 1.2 (n=3)             |
| NCI-H3122                                                           | EML4-ALK v1 | —             | 177 x/+ 1.24 (n=5)         | 35.3 x/+ 1.67 (n=6)        | 23.2 x/+ 1.41 (n=4)             | 21.3 x/+ 1.19 (n=4)        | 21.5 x/+ 1.56 (n=5) | 3.78 x/+ 1.33 (n=7)           | 128 x/+ 1.17 (n=2)  | 2.25 x/+ 1.34 (n=6)           |
| Ba/F3                                                               | EML4-ALK v1 | —             | 217 x/+ 1.79 (n=6)         | 77.4 x/+ 1.37 (n=5)        | 24.8 x/+ 2.09 (n=7)             | 36.4 x/+ 1.51 (n=10)       | 17.8 x/+ 1.76 (n=4) | < 3.64 x/+ 1.74 (n=24)        | 19.2 x/+ 1.66 (n=3) | 1.62 x/+ 1.90 (n=3)           |
| MGH064-1                                                            | EML4-ALK v2 | —             | 24.8 x/+ 1.4 (n=3)         | 3.4 x/+ 1.2 (n=3)          | 4.7 x/+ 1.2 (n=3)               | 2.1 x/+ 1.3 (n=3)          | ND                  | 0.6 x/+ 1.1 (n=3)             | ND                  | 0.3 x/+ 1.3 (n=3)             |
| MGH026-1                                                            | EML4-ALK v3 | —             | 318.5 x/+ 1.5 (n=3)        | 79.7 x/+ 1.2 (n=3)         | 79.9 x/+ 1.3 (n=3)              | 12.1 x/+ 1.2 (n=3)         | ND                  | 2.9 x/+ 1.2 (n=3)             | ND                  | 1.6 x/+ 1.2 (n=3)             |
| NCI-H2228                                                           | EML4-ALK v3 | —             | 90.0 x/+ 1.11 (n=3)        | 52.0 x/+ 1.33 (n=4)        | 13.4 x/+ 1.71 (n=3)             | 12.5 x/+ 1.45 (n=7)        | 8.77 x/+ 1.76 (n=3) | < 1.02 x/+ 1.51 (n=11)        | 5.48 x/+ 1.24 (n=2) | < 0.645 x/+ 1.21 (n=6)        |
| Ba/F3                                                               | EML4-ALK v3 | —             | 22.4 x/+ 1.3 (n=3)         | 10.7 x/+ 1.3 (n=3)         | 19.8 x/+ 1.4 (n=3)              | 7 x/+ 1.4 (n=3)            | ND                  | 2 x/+ 1.3 (n=4)               | ND                  | 1.1 x/+ 1.2 (n=4)             |
| Karpas299                                                           | NPM1-ALK    | —             | 56.9 x/+ 1.28 (n=4)        | 25.2 x/+ 1.28 (n=3)        | 19.6 x/+ 1.43 (n=5)             | 8.25 x/+ 1.74 (n=5)        | 10.5 x/+ 1.28 (n=4) | 3.27 x/+ 1.23 (n=5)           | 9.85 x/+ 1.25 (n=2) | 1.95 x/+ 1.20 (n=2)           |
| <b>Average potency, wild-type ALK fusion (8 cell lines)</b>         |             |               | <b>94.8 x/+ 2.7 (n=8)</b>  | <b>27.8 x/+ 2.9 (n=8)</b>  | <b>20.9 x/+ 2.2 (n=8)</b>       | <b>10.6 x/+ 2.3 (n=8)</b>  | <b>ND</b>           | <b>&lt; 2.1 x/+ 1.9 (n=8)</b> | <b>ND</b>           | <b>&lt; 1.1 x/+ 2 (n=8)</b>   |
| Ba/F3                                                               | EML4-ALK v1 | G1202R        | 694 x/+ 1.52 (n=6)         | 607 x/+ 1.26 (n=6)         | 893 x/+ 1.76 (n=8)              | 333 x/+ 1.51 (n=8)         | 619 x/+ 2.48 (n=5)  | 54.2 x/+ 2.00 (n=44)          | 9.45 x/+ 1.55 (n=3) | < 0.729 x/+ 1.61 (n=3)        |
| MGH953-4                                                            | EML4-ALK v3 | G1202R        | 1872.2 x/+ 1.4 (n=3)       | 316.7 x/+ 2.1 (n=3)        | 1235.4 x/+ 2 (n=3)              | 58.2 x/+ 2.7 (n=3)         | ND                  | 56.6 x/+ 1.9 (n=3)            | ND                  | 0.8 x/+ 1.6 (n=3)             |
| MGH9037-2                                                           | EML4-ALK v3 | G1202R        | 331.4 x/+ 2 (n=3)          | 71.1 x/+ 1.6 (n=3)         | 384.5 x/+ 3 (n=3)               | 34.9 x/+ 1.2 (n=3)         | ND                  | 15.5 x/+ 1.6 (n=3)            | ND                  | 0.1 x/+ 1.3 (n=3)             |
| YU-1077                                                             | EML4-ALK v3 | G1202R        | 362.9 x/+ 1 (n=2)          | 170.4 x/+ 1 (n=2)          | 377.6 x/+ 1 (n=2)               | 69.1 x/+ 1.2 (n=2)         | 231.1 x/+ 1.1 (n=2) | 9.2 x/+ 1.3 (n=2)             | ND                  | 0.2 x/+ 1 (n=2)               |
| Ba/F3                                                               | EML4-ALK v3 | G1202R        | 134.8 x/+ 1.1 (n=3)        | 137.8 x/+ 1.2 (n=3)        | 384.4 x/+ 1.1 (n=3)             | 100.2 x/+ 1.2 (n=3)        | ND                  | 53 x/+ 1.2 (n=5)              | ND                  | 0.4 x/+ 1.1 (n=5)             |
| <b>Average potency, ALK G1202R single mutation (5 cell lines)</b>   |             |               | <b>462.1 x/+ 2.7 (n=5)</b> | <b>200.1 x/+ 2.3 (n=5)</b> | <b>572.6 x/+ 1.8 (n=5)</b>      | <b>85.9 x/+ 2.3 (n=5)</b>  | <b>ND</b>           | <b>29.7 x/+ 2.3 (n=5)</b>     | <b>ND</b>           | <b>&lt; 0.3 x/+ 2.4 (n=5)</b> |
| Ba/F3                                                               | EML4-ALK v3 | T1151M        | 19.4 x/+ 1.2 (n=3)         | 12.7 x/+ 1.2 (n=3)         | 11.2 x/+ 1.1 (n=3)              | 3.7 x/+ 1 (n=3)            | ND                  | 1.8 x/+ 1.1 (n=4)             | ND                  | 1.6 x/+ 1.2 (n=4)             |
| Ba/F3                                                               | EML4-ALK v1 | T1151insT     | 571 x/+ 1.37 (n=3)         | 267 x/+ 1.60 (n=3)         | 132 x/+ 1.03 (n=2)              | 109 x/+ 1.16 (n=2)         | 112 x/+ 1.18 (n=3)  | 19.8 x/+ 1.19 (n=2)           | 52.4 x/+ 1.14 (n=2) | 6.68 x/+ 1.22 (n=2)           |
| Ba/F3                                                               | EML4-ALK v1 | C1156Y        | 231 x/+ 1.06 (n=2)         | 177 x/+ 1.38 (n=3)         | 48.3 x/+ 1.42 (n=2)             | 83.6 x/+ 1.09 (n=2)        | 21.7 x/+ 1.36 (n=2) | 6.29 x/+ 1.34 (n=3)           | 11.7 x/+ 1.04 (n=2) | 4.45 x/+ 1.11 (n=3)           |
| Ba/F3                                                               | EML4-ALK v1 | I1171N        | 365 x/+ 1.34 (n=4)         | 135 x/+ 2.23 (n=5)         | 602 x/+ 1.58 (n=5)              | 80.9 x/+ 1.33 (n=4)        | 40.9 x/+ 1.80 (n=3) | 53.1 x/+ 1.57 (n=61)          | 303 x/+ 1.17 (n=3)  | 26.7 x/+ 1.66 (n=4)           |
| Ba/F3                                                               | EML4-ALK v1 | I1171S        | 459 x/+ 1.59 (n=3)         | 102 x/+ 1.68 (n=3)         | 281 x/+ 1.76 (n=3)              | 29.8 x/+ 2.48 (n=3)        | 60.4 x/+ 1.25 (n=2) | 56.1 x/+ 1.37 (n=11)          | 251 x/+ 1.31 (n=2)  | 28.5 x/+ 1.30 (n=2)           |
| Ba/F3                                                               | EML4-ALK v1 | I1171T        | 559 x/+ 1.80 (n=3)         | 106 x/+ 1.71 (n=3)         | 191 x/+ 1.67 (n=3)              | 24.1 x/+ 2.17 (n=3)        | 85.9 x/+ 1.26 (n=2) | 54.8 x/+ 1.53 (n=14)          | 316 x/+ 1.01 (n=2)  | 35.3 x/+ 1.23 (n=2)           |
| Ba/F3                                                               | EML4-ALK v3 | F1174L        | 24.4 x/+ 1.2 (n=3)         | 13.8 x/+ 1.3 (n=3)         | 18.3 x/+ 1.4 (n=3)              | 9.2 x/+ 1.3 (n=3)          | ND                  | 2.6 x/+ 1.2 (n=4)             | ND                  | 1.3 x/+ 1.2 (n=4)             |
| Ba/F3                                                               | EML4-ALK v1 | V1180L        | 99.1 x/+ 1.03 (n=2)        | 39.8 x/+ 1.29 (n=2)        | 602 x/+ 1.17 (n=2)              | 12.7 x/+ 1.15 (n=2)        | 6.60 x/+ 1.02 (n=2) | 1.78 x/+ 1.01 (n=2)           | 59.5 x/+ 1.06 (n=2) | 0.868 x/+ 1.04 (n=2)          |
| MGH045-1                                                            | EML4-ALK v1 | L1196M        | 1024.1 x/+ 1.9 (n=3)       | 26.8 x/+ 1.8 (n=3)         | 121.3 x/+ 1.8 (n=3)             | 28 x/+ 1.6 (n=3)           | ND                  | 41.8 x/+ 1.2 (n=3)            | ND                  | 24.7 x/+ 1.4 (n=3)            |
| Ba/F3                                                               | EML4-ALK v1 | L1196M        | 1090 x/+ 1.21 (n=3)        | 79.1 x/+ 1.61 (n=3)        | 118 x/+ 1.16 (n=3)              | 99.7 x/+ 1.57 (n=5)        | 132 x/+ 1.03 (n=2)  | 68.6 x/+ 2.06 (n=20)          | 19.2 x/+ 1.28 (n=2) | 29.3 x/+ 1.09 (n=3)           |
| Ba/F3                                                               | EML4-ALK v1 | L1196Q        | 432 x/+ 1.08 (n=2)         | 150 x/+ 1.55 (n=3)         | 880 x/+ 1.01 (n=2)              | 33.7 x/+ 1.00 (n=2)        | 21.6 x/+ 1.57 (n=3) | 19.2 x/+ 1.05 (n=2)           | 14.1 x/+ 1.21 (n=3) | 9.75 x/+ 1.12 (n=2)           |
| Ba/F3                                                               | EML4-ALK v1 | L1198F        | 11.9 x/+ 1.22 (n=2)        | > 1000 x/+ 1.00 (n=2)      | 137 x/+ 1.42 (n=3)              | 97.1 x/+ 1.59 (n=4)        | 2.11 (n=1)          | 13.9 x/+ 1.35 (n=3)           | 3.21 x/+ 1.41 (n=3) | 1.89 x/+ 1.51 (n=2)           |
| Ba/F3                                                               | EML4-ALK v1 | G1202del      | 95.5 x/+ 1.17 (n=2)        | 273 x/+ 1.76 (n=3)         | 186 x/+ 1.36 (n=3)              | 122 x/+ 1.23 (n=3)         | 79.4 x/+ 1.34 (n=2) | 3.89 x/+ 1.45 (n=2)           | 13.5 x/+ 1.04 (n=2) | 4.24 x/+ 1.20 (n=2)           |
| Ba/F3                                                               | EML4-ALK v1 | D1203N        | 414 x/+ 1.00 (n=2)         | 310 x/+ 1.16 (n=2)         | 73.4 x/+ 1.18 (n=3)             | 76.3 x/+ 1.41 (n=2)        | 29.5 x/+ 2.14 (n=3) | 17.6 x/+ 1.63 (n=13)          | 59.6 x/+ 1.65 (n=2) | 22.9 x/+ 1.33 (n=4)           |
| Ba/F3                                                               | EML4-ALK v1 | S1206F        | 102 x/+ 1.03 (n=3)         | 67.0 x/+ 1.39 (n=3)        | 35.6 x/+ 1.89 (n=3)             | 90.5 x/+ 1.01 (n=2)        | 22.2 x/+ 1.12 (n=2) | 1.61 x/+ 1.15 (n=2)           | 12.3 x/+ 1.11 (n=2) | 1.28 x/+ 1.15 (n=2)           |
| Ba/F3                                                               | EML4-ALK v1 | S1206Y        | 102 x/+ 1.12 (n=2)         | 70.9 x/+ 1.65 (n=3)        | 36.3 x/+ 1.61 (n=3)             | 88.7 x/+ 1.00 (n=2)        | 29.4 x/+ 1.47 (n=3) | 2.20 x/+ 1.16 (n=2)           | 14.4 x/+ 1.08 (n=2) | 2.27 x/+ 1.75 (n=3)           |
| Ba/F3                                                               | EML4-ALK v1 | E1210K        | 113 x/+ 1.08 (n=3)         | 108 x/+ 1.30 (n=3)         | 66.7 x/+ 1.60 (n=2)             | 191 x/+ 1.09 (n=2)         | 64.2 x/+ 1.19 (n=3) | 1.02 x/+ 1.28 (n=2)           | 7.41 x/+ 1.01 (n=2) | 0.625 x/+ 1.01 (n=2)          |
| Ba/F3                                                               | EML4-ALK v1 | G1269A        | 408 x/+ 1.06 (n=3)         | 70.5 x/+ 1.27 (n=3)        | 114 x/+ 1.33 (n=3)              | 31.2 x/+ 1.11 (n=2)        | 66.0 x/+ 1.20 (n=3) | 21.0 x/+ 1.02 (n=2)           | 22.8 x/+ 1.15 (n=2) | 15.9 x/+ 1.02 (n=2)           |
| MR448re                                                             | EML4-ALK v3 | G1202R/T1151M | 727.4 x/+ 1.4 (n=2)        | 688.7 x/+ 1.2 (n=2)        | 815.4 x/+ 1.3 (n=2)             | 276.9 x/+ 1.6 (n=2)        | ND                  | 369.5 x/+ 2.4 (n=2)           | ND                  | 0.1 x/+ 1.9 (n=2)             |
| Ba/F3                                                               | EML4-ALK v3 | G1202R/T1151M | 223 x/+ 1.4 (n=4)          | 309.3 x/+ 1.4 (n=4)        | 563.6 x/+ 1.1 (n=4)             | 124.6 x/+ 1.5 (n=4)        | ND                  | 183.8 x/+ 1.5 (n=7)           | ND                  | 2.1 x/+ 1.9 (n=7)             |
| Ba/F3                                                               | EML4-ALK v3 | G1202R/F1174L | 149.1 x/+ 1.1 (n=3)        | 238.2 x/+ 1.1 (n=3)        | 461 x/+ 1.2 (n=3)               | 332.5 x/+ 1.7 (n=3)        | ND                  | 101.5 x/+ 1.2 (n=4)           | ND                  | 0.5 x/+ 1.4 (n=4)             |
| NCI-H3122                                                           | EML4-ALK v1 | G1202R/L1196M | 1600 x/+ 1.50 (n=2)        | 198 x/+ 2.72 (n=2)         | 1130 x/+ 3.40 (n=2)             | 126 x/+ 2.01 (n=2)         | 2160 x/+ 1.81 (n=2) | 1300 x/+ 1.30 (n=2)           | ND                  | 5.68 x/+ 1.35 (n=2)           |
| Ba/F3                                                               | EML4-ALK v1 | G1202R/L1196M | 1330 x/+ 1.23 (n=5)        | 1370 x/+ 1.11 (n=5)        | > 2340 x/+ 2.73 (n=6)           | 811 x/+ 1.82 (n=42)        | 2700 x/+ 1.19 (n=2) | 3530 x/+ 1.51 (n=50)          | 11.6 x/+ 1.76 (n=2) | 7.25 x/+ 1.27 (n=8)           |
| MGH953-7                                                            | EML4-ALK v3 | G1202R/L1196M | 3715.3 x/+ 1.2 (n=3)       | 365.2 x/+ 1.4 (n=3)        | 1565 x/+ 1.5 (n=3)              | 100.5 x/+ 2.1 (n=3)        | ND                  | 344.1 x/+ 2.8 (n=3)           | ND                  | 1.8 x/+ 1.5 (n=3)             |
| Ba/F3                                                               | EML4-ALK v1 | G1202R/L1198F | 166 x/+ 1.22 (n=2)         | 1290 x/+ 1.06 (n=2)        | 2150 x/+ 1.21 (n=2)             | 474 x/+ 1.16 (n=2)         | 202 x/+ 1.60 (n=2)  | 580 x/+ 1.46 (n=5)            | 2.78 x/+ 1.06 (n=2) | 2.00 x/+ 1.29 (n=3)           |
| Ba/F3                                                               | EML4-ALK v1 | G1202R/G1269A | 1050 x/+ 1.07 (n=3)        | 352 x/+ 1.22 (n=3)         | 1340 x/+ 1.47 (n=3)             | 241 x/+ 1.38 (n=6)         | 1670 x/+ 1.27 (n=2) | 899 x/+ 1.41 (n=10)           | 28.2 x/+ 1.09 (n=2) | 3.01 x/+ 1.56 (n=3)           |
| <b>Average potency, ALK G1202R compound mutation (8 cell lines)</b> |             |               | <b>653.7 x/+ 3.3 (n=8)</b> | <b>467.5 x/+ 2.1 (n=8)</b> | <b>&gt;1122.8 x/+ 1.8 (n=8)</b> | <b>246.1 x/+ 2.1 (n=8)</b> | <b>ND</b>           | <b>523.9 x/+ 3.1 (n=8)</b>    | <b>ND</b>           | <b>1.6 x/+ 4 (n=8)</b>        |
| Ba/F3                                                               | EML4-ALK v1 | I1171N/L1198F | 30.8 x/+ 1.40 (n=2)        | 1100 x/+ 1.12 (n=2)        | 199 x/+ 1.62 (n=2)              | 29.5 x/+ 1.23 (n=2)        | 2.99 x/+ 1.52 (n=2) | 183 x/+ 1.37 (n=30)           | 30.1 x/+ 1.30 (n=2) | 15.7 x/+ 1.36 (n=3)           |
| Ba/F3                                                               | EML4-ALK v1 | I1171N/D1203N | 759 x/+ 1.65 (n=5)         | 695 x/+ 1.82 (n=5)         | 2110 x/+ 1.57 (n=5)             | 1310 x/+ 1.42 (n=7)        | 81.8 x/+ 1.92 (n=3) | 599 x/+ 1.58 (n=99)           | 1590 x/+ 1.44 (n=7) | 341 x/+ 1.35 (n=7)            |
| Kelly                                                               | —           | F1174L        | 98.0 x/+ 1.22 (n=2)        | 64.8 x/+ 1.38 (n=4)        | 68.5 x/+ 1.41 (n=3)             | 34.8 x/+ 1.10 (n=2)        | 26.4 x/+ 1.39 (n=3) | 8.15 x/+ 1.40 (n=5)           | 9.47 x/+ 1.79 (n=2) | 9.11 x/+ 1.28 (n=5)           |
| SH-SY5Y                                                             | —           | F1174L        | 226 x/+ 1.47 (n=2)         | 124 x/+ 1.05 (n=2)         | 190 x/+ 1.33 (n=2)              | 262 x/+ 1.03 (n=2)         | 78.9 x/+ 1.20 (n=2) | 31.4 x/+ 1.82 (n=3)           | 23.6 x/+ 1.67 (n=2) | 19.0 x/+ 2.07 (n=3)           |
| NB-1                                                                | —           | Amp, Ex2-3del | 22.0 x/+ 1.24 (n=2)        | 12.3 x/+ 1.20 (n=2)        | 11.4 x/+ 1.13 (n=2)             | 6.92 x/+ 1.14 (n=2)        | 5.06 x/+ 1.01 (n=2) | 2.62 x/+ 1.22 (n=3)           | 5.74 x/+ 1.03 (n=2) | 1.99 x/+ 1.27 (n=3)           |
| Aska-SS                                                             | —           | Ex2-17del     | 43.7 x/+ 1.54 (n=3)        | 29.1 x/+ 1.01 (n=2)        | 26.8 x/+ 1.84 (n=3)             | 12.7 x/+ 1.12 (n=2)        | 16.2 x/+ 1.47 (n=3) | 6.73 x/+ 1.08 (n=3)           | 34.7 x/+ 1.38 (n=2) | 6.96 x/+ 1.32 (n=3)           |

**Supplementary Figure S4. Potency in cell viability assay.** Cell viability IC<sub>50</sub> (nmol/L) is shown as geometric mean x/+ standard deviation (number of repeats). Average potencies, highlighted in blue, reflect the geometric mean across the cell lines within each category (wild-type kinase domain, G1202R single mutants, or G1202R compound mutants). ND, not determined.

Maximal Effect ( $E_{max}$ , %) in Cell Viability Assay

| Cell Name | Fusion      | Mutation      | Crizotinib                   | Ceritinib                    | Alectinib                    | Brigatinib                    | Ensartinib                   | Lorlatinib                    | Zotizalcikib                 | NVL-655                      |
|-----------|-------------|---------------|------------------------------|------------------------------|------------------------------|-------------------------------|------------------------------|-------------------------------|------------------------------|------------------------------|
| MGH048-1  | EML4-ALK v1 | —             | 105.4 [99.54 to 111.6]       | 106.9 [99.40 to ???]         | 108.7 [101.2 to 117.0]       | 104.5 [94.97 to 114.4]        | ND                           | 100.9 [92.78 to 109.2]        | ND                           | 105.7 [97.57 to 115.1]       |
| NCI-H3122 | EML4-ALK v1 | —             | 70.5 $\times/\pm$ 1.13 (n=5) | 78.1 $\times/\pm$ 1.10 (n=6) | 70.6 $\times/\pm$ 1.09 (n=4) | 75.1 $\times/\pm$ 1.11 (n=4)  | 67.0 $\times/\pm$ 1.06 (n=5) | 71.2 $\times/\pm$ 1.11 (n=7)  | 82.9 $\times/\pm$ 1.03 (n=2) | 68.9 $\times/\pm$ 1.15 (n=6) |
| Ba/F3     | EML4-ALK v1 | —             | 99.9 $\times/\pm$ 1.00 (n=6) | 100 $\times/\pm$ 1.00 (n=5)  | 99.6 $\times/\pm$ 1.01 (n=7) | 99.8 $\times/\pm$ 1.00 (n=10) | 99.5 $\times/\pm$ 1.01 (n=4) | 99.8 $\times/\pm$ 1.00 (n=24) | 99.9 $\times/\pm$ 1.00 (n=3) | 99.3 $\times/\pm$ 1.01 (n=3) |
| MGH064-1  | EML4-ALK v2 | —             | 100.2 [96.35 to 104.2]       | 98.09 [94.03 to 102.4]       | 96.99 [94.01 to 100.1]       | 97.78 [93.05 to 103.0]        | ND                           | 100.9 [97.50 to 104.6]        | ND                           | 97.02 [91.72 to 102.8]       |
| MGH026-1  | EML4-ALK v3 | —             | 100.7 [96.15 to 105.5]       | 99.18 [93.99 to 104.8]       | 101.2 [96.69 to 106.1]       | 96.86 [94.13 to 99.74]        | ND                           | 103.2 [98.26 to 108.5]        | ND                           | 103.7 [97.75 to 110.3]       |
| NCI-H2228 | EML4-ALK v3 | —             | 32.4 $\times/\pm$ 1.75 (n=4) | 30.3 $\times/\pm$ 1.47 (n=5) | 32.5 $\times/\pm$ 1.73 (n=4) | 38.4 $\times/\pm$ 1.68 (n=8)  | 27.6 $\times/\pm$ 1.68 (n=4) | 33.2 $\times/\pm$ 1.44 (n=12) | 30.1 $\times/\pm$ 1.30 (n=2) | 29.4 $\times/\pm$ 1.73 (n=6) |
| Ba/F3     | EML4-ALK v3 | —             | 100.3 $\times/\pm$ 1 (n=3)   | 99.5 $\times/\pm$ 1 (n=3)    | 100.4 $\times/\pm$ 1 (n=3)   | 98.8 $\times/\pm$ 1 (n=3)     | ND                           | 99.5 $\times/\pm$ 1 (n=4)     | ND                           | 99.7 $\times/\pm$ 1 (n=4)    |
| Karpas299 | NPM1-ALK    | —             | 82.6 $\times/\pm$ 1.06 (n=4) | 78.6 $\times/\pm$ 1.07 (n=3) | 78.2 $\times/\pm$ 1.11 (n=5) | 76.2 $\times/\pm$ 1.08 (n=5)  | 80.0 $\times/\pm$ 1.09 (n=4) | 76.9 $\times/\pm$ 1.08 (n=5)  | 73.4 $\times/\pm$ 1.09 (n=2) | 80.5 $\times/\pm$ 1.06 (n=2) |
| Ba/F3     | EML4-ALK v1 | G1202R        | 99.8 $\times/\pm$ 1.00 (n=6) | 99.9 $\times/\pm$ 1.00 (n=6) | 91.8 $\times/\pm$ 1.16 (n=8) | 100 $\times/\pm$ 1.00 (n=8)   | 99.9 $\times/\pm$ 1.00 (n=5) | 99.8 $\times/\pm$ 1.01 (n=44) | 100 $\times/\pm$ 1.00 (n=3)  | 99.7 $\times/\pm$ 1.00 (n=3) |
| MGH953-4  | EML4-ALK v3 | G1202R        | 100.1 [95.65 to 104.4]       | 94.83 [??? to 102.3]         | 98.24 [91.90 to 105.4]       | 93.14 [82.33 to 103.9]        | ND                           | 96.7 [88.72 to 106.2]         | ND                           | 97.29 [89.44 to 106.8]       |
| MGH9037-2 | EML4-ALK v3 | G1202R        | 98.9 [91.36 to 105.8]        | 93.48 [87.99 to 99.29]       | 100.7 [90.98 to 109.9]       | 94.84 [90.93 to 99.05]        | ND                           | 98.15 [91.71 to 105.3]        | ND                           | 100.3 [94.98 to 106.0]       |
| YU-1077   | EML4-ALK v3 | G1202R        | 50 $\times/\pm$ 1 (n=2)       | 50 $\times/\pm$ 1 (n=2)      | 50 $\times/\pm$ 1 (n=2)       | ND                           | 50 $\times/\pm$ 1 (n=2)      |
| Ba/F3     | EML4-ALK v3 | G1202R        | 100.3 $\times/\pm$ 1 (n=3)   | 99.7 $\times/\pm$ 1 (n=3)    | 102.8 $\times/\pm$ 1 (n=3)   | 100.4 $\times/\pm$ 1 (n=3)    | ND                           | 100.6 $\times/\pm$ 1 (n=5)    | ND                           | 99.6 $\times/\pm$ 1 (n=5)    |
| Ba/F3     | EML4-ALK v3 | T1151M        | 100.5 $\times/\pm$ 1 (n=3)   | 99.6 $\times/\pm$ 1 (n=3)    | 100.4 $\times/\pm$ 1 (n=3)   | 100.1 $\times/\pm$ 1 (n=3)    | ND                           | 99.9 $\times/\pm$ 1 (n=4)     | ND                           | 100.1 $\times/\pm$ 1 (n=4)   |
| Ba/F3     | EML4-ALK v1 | T1151insT     | 99.9 $\times/\pm$ 1.00 (n=3) | 100 $\times/\pm$ 1.00 (n=3)  | 99.7 $\times/\pm$ 1.00 (n=2) | 100 $\times/\pm$ 1.00 (n=2)   | 99.3 $\times/\pm$ 1.01 (n=3) | 100 $\times/\pm$ 1.00 (n=2)   | 99.4 $\times/\pm$ 1.01 (n=2) | 99.3 $\times/\pm$ 1.01 (n=2) |
| Ba/F3     | EML4-ALK v1 | C1156Y        | 100 $\times/\pm$ 1.00 (n=2)  | 99.9 $\times/\pm$ 1.00 (n=3) | 99.4 $\times/\pm$ 1.00 (n=2) | 99.5 $\times/\pm$ 1.01 (n=2)  | 99.8 $\times/\pm$ 1.00 (n=2) | 99.4 $\times/\pm$ 1.01 (n=3)  | 98.6 $\times/\pm$ 1.00 (n=2) | 99.1 $\times/\pm$ 1.01 (n=3) |
| Ba/F3     | EML4-ALK v1 | I1171N        | 100 $\times/\pm$ 1.00 (n=4)  | 100 $\times/\pm$ 1.00 (n=5)  | 99.0 $\times/\pm$ 1.02 (n=5) | 100 $\times/\pm$ 1.00 (n=4)   | 100 $\times/\pm$ 1.00 (n=3)  | 99.8 $\times/\pm$ 1.00 (n=61) | 99.5 $\times/\pm$ 1.01 (n=3) | 100 $\times/\pm$ 1.00 (n=4)  |
| Ba/F3     | EML4-ALK v1 | I1171S        | 99.8 $\times/\pm$ 1.00 (n=3) | 99.8 $\times/\pm$ 1.00 (n=3) | 99.9 $\times/\pm$ 1.00 (n=3) | 99.4 $\times/\pm$ 1.01 (n=3)  | 100 $\times/\pm$ 1.00 (n=2)  | 99.8 $\times/\pm$ 1.00 (n=11) | 100 $\times/\pm$ 1.00 (n=2)  | 100 $\times/\pm$ 1.00 (n=2)  |
| Ba/F3     | EML4-ALK v1 | I1171T        | 99.9 $\times/\pm$ 1.00 (n=3) | 100 $\times/\pm$ 1.00 (n=3)  | 100 $\times/\pm$ 1.00 (n=3)  | 100 $\times/\pm$ 1.00 (n=3)   | 100 $\times/\pm$ 1.00 (n=2)  | 99.8 $\times/\pm$ 1.00 (n=14) | 100 $\times/\pm$ 1.00 (n=2)  | 99.8 $\times/\pm$ 1.00 (n=2) |
| Ba/F3     | EML4-ALK v3 | F1174L        | 100.3 $\times/\pm$ 1 (n=3)   | 99.7 $\times/\pm$ 1 (n=3)    | 100.6 $\times/\pm$ 1 (n=3)   | 99.6 $\times/\pm$ 1 (n=3)     | ND                           | 99.8 $\times/\pm$ 1 (n=4)     | ND                           | 100.1 $\times/\pm$ 1 (n=4)   |
| Ba/F3     | EML4-ALK v1 | V1180L        | 100 $\times/\pm$ 1.00 (n=2)   | 100 $\times/\pm$ 1.00 (n=2)  | 100 $\times/\pm$ 1.00 (n=2)   | 100 $\times/\pm$ 1.00 (n=2)  | 100 $\times/\pm$ 1.00 (n=2)  |
| MGH045-1  | EML4-ALK v1 | L1196M        | 101.8 [94.15 to 109.0]       | 104.2 [96.71 to 112.6]       | 103.3 [96.57 to 111.0]       | 106.6 [99.93 to 113.8]        | ND                           | 105.4 [99.56 to 111.7]        | ND                           | 103.5 [96.70 to 110.9]       |
| Ba/F3     | EML4-ALK v1 | L1196M        | 100 $\times/\pm$ 1.00 (n=3)  | 100 $\times/\pm$ 1.00 (n=3)  | 99.9 $\times/\pm$ 1.00 (n=3) | 100 $\times/\pm$ 1.00 (n=5)   | 100 $\times/\pm$ 1.00 (n=2)  | 99.8 $\times/\pm$ 1.01 (n=20) | 100 $\times/\pm$ 1.00 (n=2)  | 100 $\times/\pm$ 1.00 (n=3)  |
| Ba/F3     | EML4-ALK v1 | L1196Q        | 100 $\times/\pm$ 1.00 (n=2)  | 100 $\times/\pm$ 1.00 (n=3)  | 100 $\times/\pm$ 1.00 (n=2)  | 100 $\times/\pm$ 1.00 (n=2)   | 100 $\times/\pm$ 1.00 (n=3)  | 100 $\times/\pm$ 1.00 (n=2)   | 98.7 $\times/\pm$ 1.01 (n=3) | 99.9 $\times/\pm$ 1.00 (n=2) |
| Ba/F3     | EML4-ALK v1 | L1198F        | 100 $\times/\pm$ 1.00 (n=2)  | 100 $\times/\pm$ 1.00 (n=2)  | 100 $\times/\pm$ 1.00 (n=3)  | 100 $\times/\pm$ 1.00 (n=4)   | 100 (n=1)                    | 99.9 $\times/\pm$ 1.00 (n=3)  | 100 $\times/\pm$ 1.00 (n=3)  | 100 $\times/\pm$ 1.00 (n=2)  |
| Ba/F3     | EML4-ALK v1 | G1202del      | 99.5 $\times/\pm$ 1.01 (n=2) | 99.7 $\times/\pm$ 1.01 (n=3) | 99.2 $\times/\pm$ 1.01 (n=3) | 99.4 $\times/\pm$ 1.01 (n=3)  | 99.3 $\times/\pm$ 1.00 (n=2) | 99.6 $\times/\pm$ 1.01 (n=2)  | 98.1 $\times/\pm$ 1.02 (n=2) | 98.9 $\times/\pm$ 1.00 (n=2) |
| Ba/F3     | EML4-ALK v1 | D1203N        | 100 $\times/\pm$ 1.00 (n=2)  | 100 $\times/\pm$ 1.00 (n=2)  | 100 $\times/\pm$ 1.00 (n=3)  | 100 $\times/\pm$ 1.00 (n=2)   | 99.8 $\times/\pm$ 1.00 (n=3) | 99.8 $\times/\pm$ 1.00 (n=14) | 99.9 $\times/\pm$ 1.00 (n=3) | 100 $\times/\pm$ 1.00 (n=4)  |
| Ba/F3     | EML4-ALK v1 | S1206F        | 99.4 $\times/\pm$ 1.01 (n=3) | 100 $\times/\pm$ 1.00 (n=3)  | 100 $\times/\pm$ 1.00 (n=3)  | 100 $\times/\pm$ 1.00 (n=2)   | 100 $\times/\pm$ 1.00 (n=2)  | 100 $\times/\pm$ 1.00 (n=2)   | 100 $\times/\pm$ 1.00 (n=2)  | 100 $\times/\pm$ 1.00 (n=2)  |
| Ba/F3     | EML4-ALK v1 | S1206Y        | 100 $\times/\pm$ 1.00 (n=2)  | 100 $\times/\pm$ 1.00 (n=3)  | 100 $\times/\pm$ 1.00 (n=3)  | 100 $\times/\pm$ 1.00 (n=2)   | 100 $\times/\pm$ 1.00 (n=3)  | 100 $\times/\pm$ 1.00 (n=2)   | 98.8 $\times/\pm$ 1.00 (n=2) | 99.8 $\times/\pm$ 1.00 (n=3) |
| Ba/F3     | EML4-ALK v1 | E1210K        | 100 $\times/\pm$ 1.00 (n=3)  | 99.9 $\times/\pm$ 1.00 (n=3) | 99.6 $\times/\pm$ 1.00 (n=2) | 99.8 $\times/\pm$ 1.00 (n=2)  | 99.8 $\times/\pm$ 1.00 (n=3) | 100 $\times/\pm$ 1.00 (n=2)   | 99.6 $\times/\pm$ 1.00 (n=2) | 99.5 $\times/\pm$ 1.00 (n=2) |
| Ba/F3     | EML4-ALK v1 | G1269A        | 100 $\times/\pm$ 1.00 (n=3)  | 100 $\times/\pm$ 1.00 (n=3)  | 98.9 $\times/\pm$ 1.01 (n=3) | 99.9 $\times/\pm$ 1.00 (n=2)  | 100 $\times/\pm$ 1.00 (n=3)  | 99.9 $\times/\pm$ 1.00 (n=2)  | 100 $\times/\pm$ 1.00 (n=2)  | 100 $\times/\pm$ 1.00 (n=2)  |
| MR448re   | EML4-ALK v3 | G1202R/T1151M | 120.7 $\times/\pm$ 1.2 (n=2) | 122.3 $\times/\pm$ 1.1 (n=2) | 115.6 $\times/\pm$ 1.1 (n=2) | 111 $\times/\pm$ 1 (n=2)      | ND                           | 84 $\times/\pm$ 1.1 (n=2)     | ND                           | 70.8 $\times/\pm$ 1 (n=2)    |
| Ba/F3     | EML4-ALK v3 | G1202R/T1151M | 99.4 $\times/\pm$ 1 (n=4)    | 101.3 $\times/\pm$ 1 (n=4)   | 98.6 $\times/\pm$ 1 (n=4)    | 100.1 $\times/\pm$ 1 (n=4)    | ND                           | 95.4 $\times/\pm$ 1.1 (n=7)   | ND                           | 85.1 $\times/\pm$ 1.3 (n=7)  |
| Ba/F3     | EML4-ALK v3 | G1202R/F1174L | 99.8 $\times/\pm$ 1 (n=3)    | 100.4 $\times/\pm$ 1 (n=3)   | 99.3 $\times/\pm$ 1 (n=3)    | 100.8 $\times/\pm$ 1 (n=3)    | ND                           | 99.5 $\times/\pm$ 1 (n=4)     | ND                           | 99.4 $\times/\pm$ 1 (n=4)    |
| NCI-H3122 | EML4-ALK v1 | G1202R/L1196M | 75.0 $\times/\pm$ 1.00 (n=2)  | 75.0 $\times/\pm$ 1.00 (n=2) | 75.0 $\times/\pm$ 1.00 (n=2)  | ND                           | 74.1 $\times/\pm$ 1.05 (n=2) |
| Ba/F3     | EML4-ALK v1 | G1202R/L1196M | 97.9 $\times/\pm$ 1.03 (n=5) | 99.8 $\times/\pm$ 1.00 (n=5) | 112 $\times/\pm$ 3.13 (n=6)  | 99.9 $\times/\pm$ 1.00 (n=42) | 98.6 $\times/\pm$ 1.02 (n=2) | 97.6 $\times/\pm$ 1.05 (n=51) | 100 $\times/\pm$ 1.00 (n=2)  | 99.9 $\times/\pm$ 1.00 (n=8) |
| MGH953-7  | EML4-ALK v3 | G1202R/L1196M | 96.87 [92.17 to 101.1]       | 91.84 [87.11 to 96.45]       | 94.66 [90.62 to 98.89]       | 94.08 [86.17 to 102.7]        | ND                           | 94.95 [86.81 to 104.3]        | ND                           | 92.03 [85.74 to 100.1]       |
| Ba/F3     | EML4-ALK v1 | G1202R/L1198F | 100 $\times/\pm$ 1.00 (n=2)   | 100 $\times/\pm$ 1.00 (n=2)  | 100 $\times/\pm$ 1.00 (n=5)   | 100 $\times/\pm$ 1.00 (n=2)  | 100 $\times/\pm$ 1.00 (n=3)  |
| Ba/F3     | EML4-ALK v1 | G1202R/G1269A | 98.2 $\times/\pm$ 1.03 (n=3) | 99.9 $\times/\pm$ 1.00 (n=3) | 100 $\times/\pm$ 1.00 (n=3)  | 99.9 $\times/\pm$ 1.00 (n=6)  | 99.7 $\times/\pm$ 1.00 (n=2) | 100 $\times/\pm$ 1.00 (n=10)  | 100 $\times/\pm$ 1.00 (n=2)  | 99.8 $\times/\pm$ 1.00 (n=3) |
| Ba/F3     | EML4-ALK v1 | I1171N/L1198F | 100 $\times/\pm$ 1.00 (n=2)   | 100 $\times/\pm$ 1.00 (n=2)  | 100 $\times/\pm$ 1.00 (n=30)  | 100 $\times/\pm$ 1.00 (n=2)  | 100 $\times/\pm$ 1.00 (n=3)  |
| Ba/F3     | EML4-ALK v1 | I1171N/D1203N | 99.9 $\times/\pm$ 1.00 (n=5) | 100 $\times/\pm$ 1.00 (n=5)  | 97.0 $\times/\pm$ 1.07 (n=5) | 100 $\times/\pm$ 1.00 (n=7)   | 100 $\times/\pm$ 1.00 (n=3)  | 99.1 $\times/\pm$ 1.05 (n=99) | 99.9 $\times/\pm$ 1.00 (n=7) | 99.9 $\times/\pm$ 1.00 (n=7) |
| Kelly     | —           | F1174L        | 74.3 $\times/\pm$ 1.02 (n=2) | 69.9 $\times/\pm$ 1.13 (n=4) | 66.1 $\times/\pm$ 1.06 (n=3) | 68.3 $\times/\pm$ 1.02 (n=2)  | 65.0 $\times/\pm$ 1.03 (n=3) | 61.4 $\times/\pm$ 1.05 (n=5)  | 58.4 $\times/\pm$ 1.04 (n=2) | 63.9 $\times/\pm$ 1.06 (n=5) |
| SH-SY5Y   | —           | F1174L        | 44.7 $\times/\pm$ 1.17 (n=2) | 44.7 $\times/\pm$ 1.17 (n=2) | 45.8 $\times/\pm$ 1.21 (n=2) | 44.7 $\times/\pm$ 1.17 (n=2)  | 41.9 $\times/\pm$ 1.13 (n=2) | 47.0 $\times/\pm$ 1.02 (n=3)  | 39.1 $\times/\pm$ 1.03 (n=2) | 45.5 $\times/\pm$ 1.16 (n=3) |
| NB-1      | —           | Amp, Ex2-3del | 82.5 $\times/\pm$ 1.04 (n=2) | 76.4 $\times/\pm$ 1.23 (n=2) | 79.2 $\times/\pm$ 1.06 (n=2) | 79.0 $\times/\pm$ 1.05 (n=2)  | 81.7 $\times/\pm$ 1.04 (n=2) | 80.2 $\times/\pm$ 1.03 (n=3)  | 82.7 $\times/\pm$ 1.03 (n=2) | 80.5 $\times/\pm$ 1.04 (n=3) |
| Aska-SS   | —           | Ex2-17del     | 78.3 $\times/\pm$ 1.04 (n=3) | 81.2 $\times/\pm$ 1.01 (n=2) | 79.2 $\times/\pm$ 1.05 (n=3) | 80.0 $\times/\pm$ 1.00 (n=2)  | 80.8 $\times/\pm$ 1.03 (n=3) | 77.7 $\times/\pm$ 1.01 (n=3)  | 76.5 $\times/\pm$ 1.07 (n=2) | 78.7 $\times/\pm$ 1.05 (n=3) |

**Supplementary Figure S5. Maximal effect ( $E_{max}$ ) in cell viability assay.** Cell viability  $E_{max}$  (%) is shown in either of the following two formats. The first format is based on analysis of individual experimental repeats plotted separately and then averaged to obtain “geometric mean  $\times/\pm$  geometric standard deviation (number of repeats)”. The second format is based on composite analysis of all repeats plotted together and then fitted to obtain “best-fit value [95% confidence interval] (number of repeats)”. ND, not determined.

### A Treatment History and Cell Viability Potency of Patient-Derived Cell Lines

| Patient-derived cell line | EML4-ALK         | Prior TKI  |           |            |            | IC <sub>50</sub> (nmol/L) |           |           |            |            | NVL-655 |
|---------------------------|------------------|------------|-----------|------------|------------|---------------------------|-----------|-----------|------------|------------|---------|
|                           |                  | Crizotinib | Alectinib | Brigatinib | Lorlatinib | Crizotinib                | Ceritinib | Alectinib | Brigatinib | Lorlatinib |         |
| MGH048-1                  | v1               |            |           |            |            | 188                       | 35        | 33        | 11         | 2.2        | 0.8     |
| MGH064-1                  | v2               |            |           |            |            | 25                        | 3.4       | 4.7       | 2.1        | 0.6        | 0.3     |
| MGH026-1                  | v3               |            |           |            |            | 319                       | 80        | 80        | 12         | 2.9        | 1.6     |
| MGH953-4                  | v3 G1202R        | ●          | ●         |            |            | 1872                      | 317       | 1235      | 58         | 57         | 0.8     |
| MGH9037-2                 | v3 G1202R        |            |           | ●          |            | 331                       | 71        | 385       | 35         | 16         | 0.1     |
| YU-1077                   | v3 G1202R        |            | ●         |            |            | 363                       | 170       | 378       | 69         | 9.2        | 0.2     |
| MR448re                   | v3 G1202R/T1151M | ●          | ●         | ●          | ●          | 727                       | 689       | 815       | 277        | 370        | 0.1     |
| MGH953-7                  | v3 G1202R/L1196M | ●          | ●         |            | ●          | 3715                      | 365       | 1565      | 101        | 344        | 1.8     |
| MGH045-1                  | v1 L1196M        | ●          |           |            |            | 1024                      | 27        | 121       | 28         | 42         | 25      |

### B

#### Cell Viability Potency Relative to NVL-655 ALK fusion with wild-type kinase domain

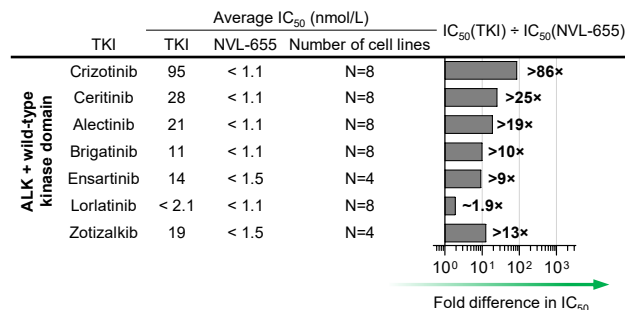

### C

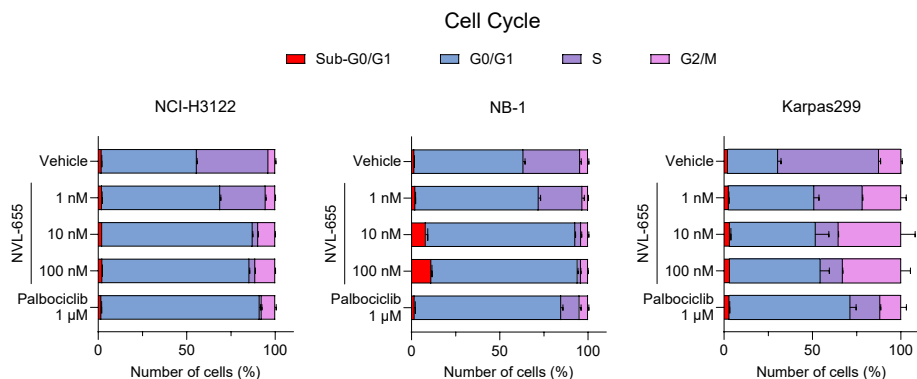

### E

#### Annexin V and PI Staining

Legend: Late apoptosis (Annexin V<sup>+</sup>, PI<sup>+</sup>) (purple), Early apoptosis (Annexin V<sup>+</sup>, PI<sup>-</sup>) (pink)

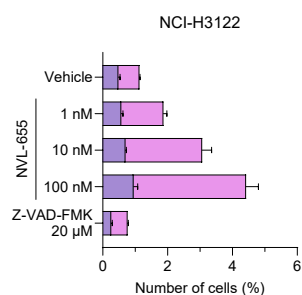

### D

#### Caspase 3/7 Activation

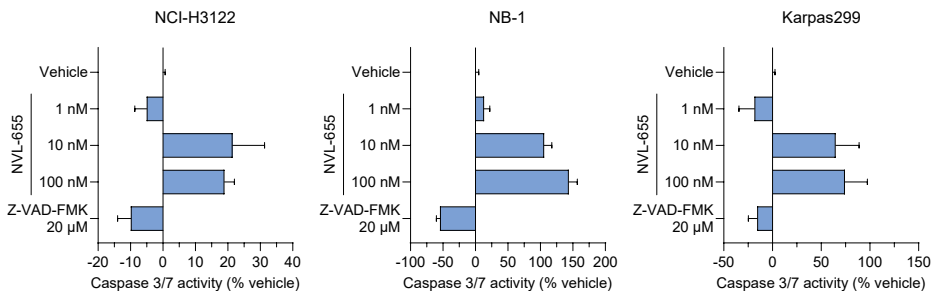

### F

#### Cell Viability Potency Relative to NVL-655 ALK G1202R single mutation

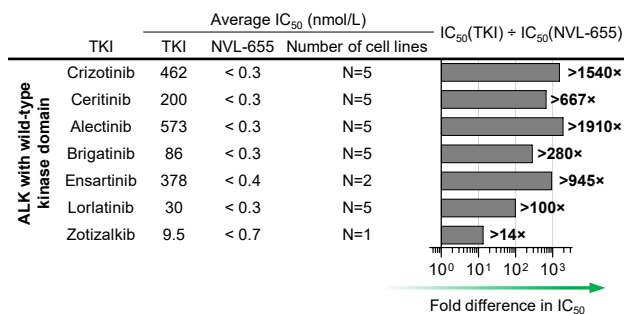

### G

#### Cell Viability Potency Relative to NVL-655 ALK G1202R compound mutation

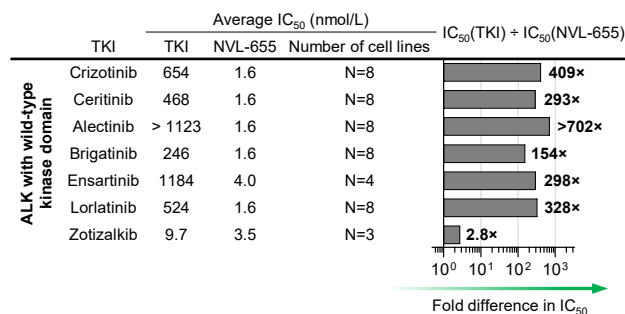

**Supplementary Figure S6. Cellular activity of NVL-655.** **A**, Table showing prior TKI treatment (dots) for the 9 patient-derived cell lines used in this report. YU-1077 was collected while patient was on ceritinib treatment. **B**, ALK wild-type potency of 7 TKIs relative to NVL-655, calculated by dividing IC<sub>50</sub>(TKI) by IC<sub>50</sub>(NVL-655) in each row. IC<sub>50</sub> indicates geometric mean IC<sub>50</sub> across individual cell lines. For ensartinib and zotizakib, which were not tested in all cell lines, only the matched cell lines were used to calculate IC<sub>50</sub>. “Relative potency >” is treated as “relative potency =” for graph plotting. **C**, Cell cycle analysis with FITC BrdU and 7-AAD after 24-hour treatment, with palbociclib (an inhibitor of CDK4/6 causing G1 cell cycle arrest) serving as a control. Mean ± SD (2 technical replicates). **D**, Caspase activation analysis using the Caspase-Glo assay after 24-hour treatment, with Z-VAD-FMK (a pan-caspase inhibitor) serving as a control. Mean ± SD (2 technical replicates). **E**, Apoptosis analysis using Annexin V and propidium iodide (PI) staining after 24-hour treatment, with Z-VAD-FMK serving as a control. Mean ± SD (2 technical replicates). **F–G**, Same as panel B but for ALK G1202R (**F**) or ALK G1202R/L1196M (**G**).

**A**

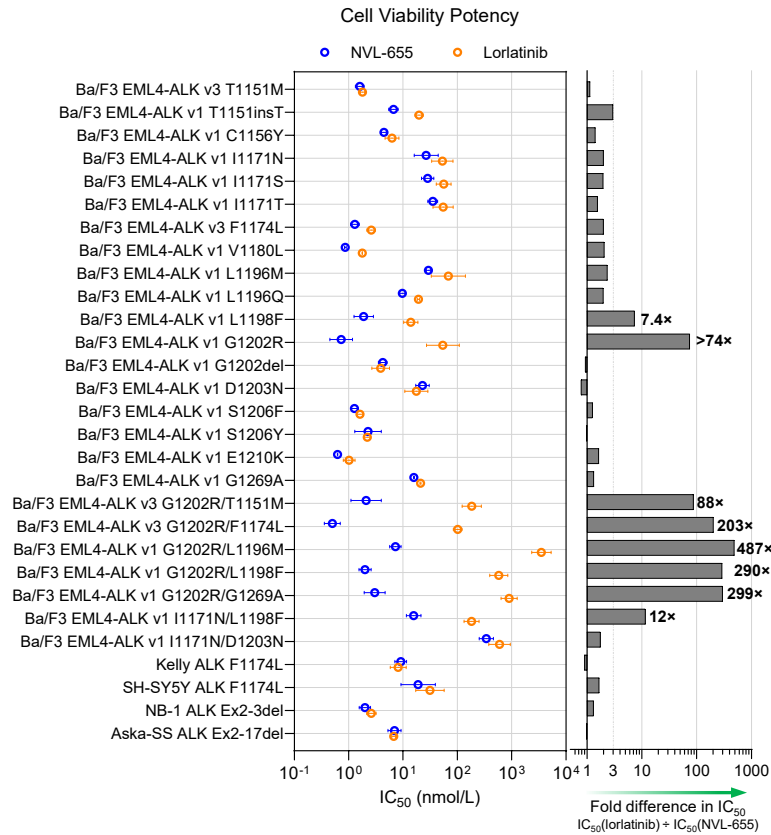

**B**

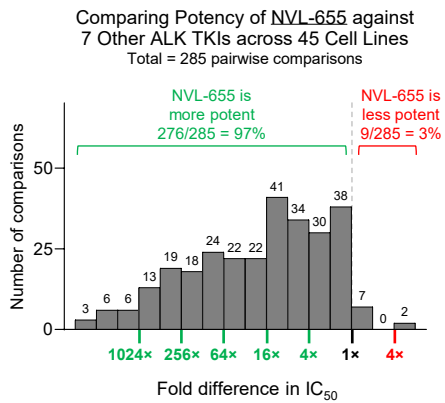

**C**

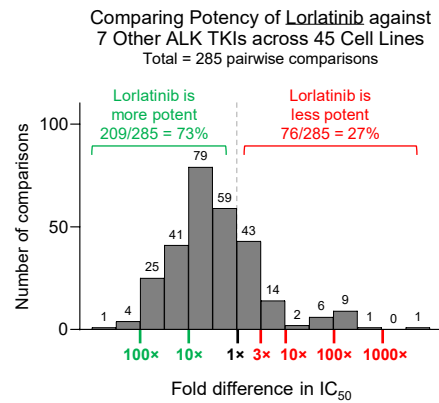

**Supplementary Figure S7. Comparing NVL-655 and lorlatinib potency.** **A**, Plot showing geometric mean and standard deviation of  $IC_{50}$  for NVL-655 (blue) and lorlatinib (orange) against cell lines harboring various ALK mutations. Graph indicates fold difference in  $IC_{50}$  compared to NVL-655. **B**, Histogram showing the fold-difference in  $IC_{50}$  between NVL-655 and the 7 other ALK TKIs across 45 cell lines shown in Supplementary Fig. S4. Theoretically, there are  $7 \times 45 = 315$  total combinations, but only 285 are shown due to 30 datapoints being “not determined”. Green text indicates that NVL-655 was more potent, whereas red text indicates that NVL-655 was less potent. **C**, Same as panel B, except for lorlatinib instead of NVL-655.



**ALK with no resistance mutations**

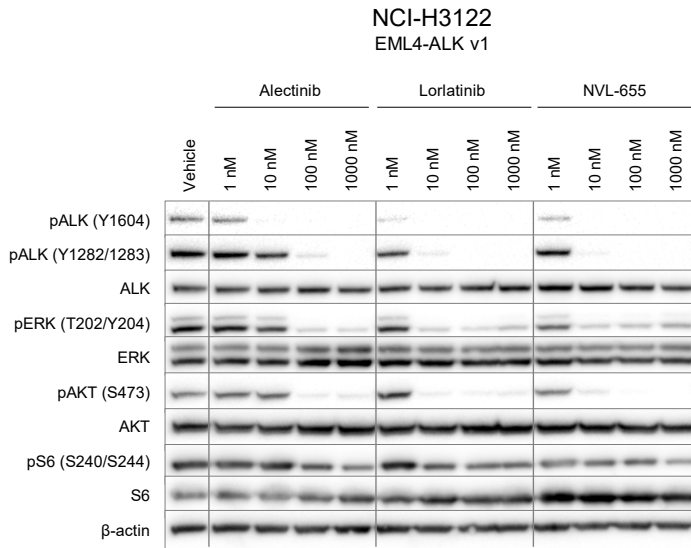

**ALK G1202R compound mutation**

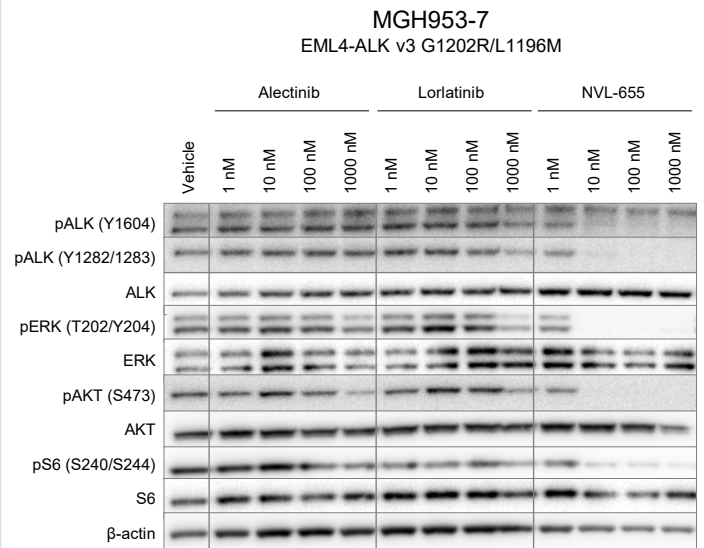

**ALK G1202R single mutation**

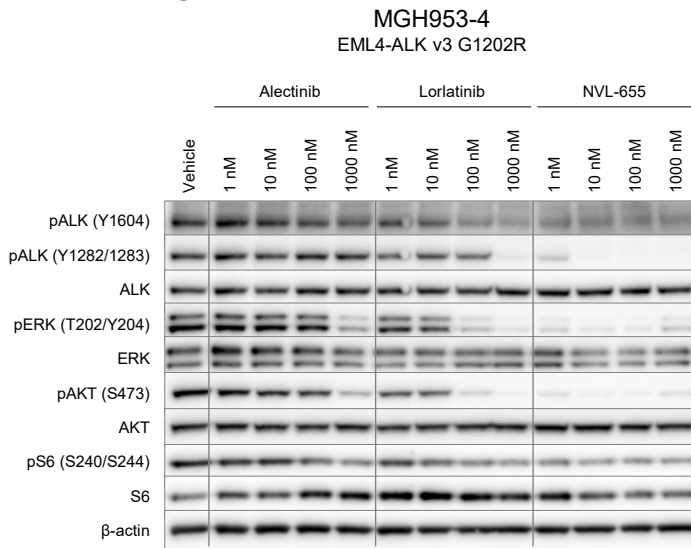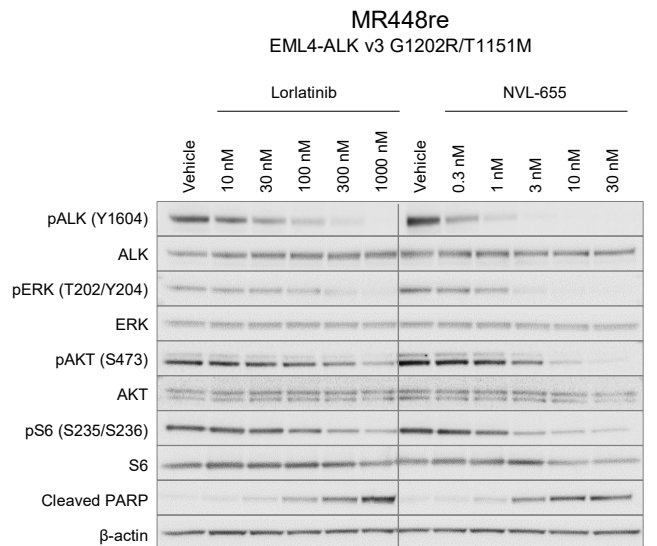

**YU-1077**  
EML4-ALK v3 G1202R

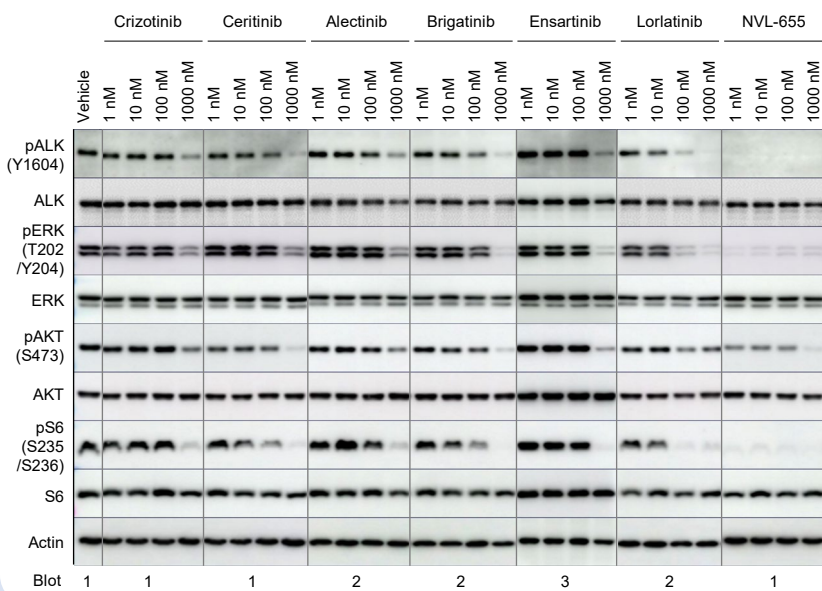

**ALK non-G1202R mutation**

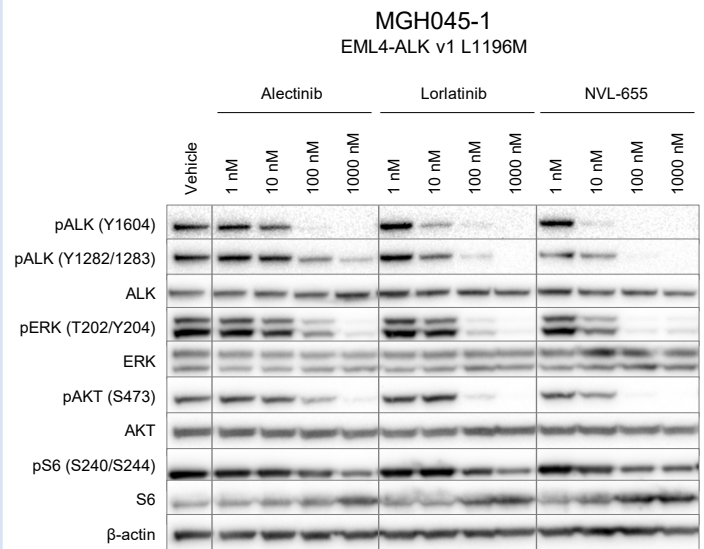

**Supplementary Figure S8. Pathway analysis in cell lines.** For YU-1077, the experiment was performed across 3 blot papers and was reordered based on ALK TKI generations, with the matching blot paper numbers indicated at the bottom.

Cell Viability Potency

| Cell line | Genetics or condition  | Lorlatinib IC <sub>50</sub> (nmol/L) | NVL-655 IC <sub>50</sub> (nmol/L) |
|-----------|------------------------|--------------------------------------|-----------------------------------|
| Ba/F3     | EML4-ALK v1 wild-type  | < 3.6 $\times/\pm$ 1.7 (n=24)        | 1.6 $\times/\pm$ 1.9 (n=3)        |
| Ba/F3     | CD74-ROS1 wild-type    | 1.4 $\times/\pm$ 1.9 (n=17)          | 0.7 $\times/\pm$ 1.5 (n=3)        |
| Ba/F3     | CD74-ROS1 G2032R       | 326 $\times/\pm$ 1.4 (n=28)          | 1.1 $\times/\pm$ 1.6 (n=8)        |
| Ba/F3     | CLIP1-LTK              | 1.3 $\times/\pm$ 1.4 (n=3)           | 1.9 $\times/\pm$ 1.4 (n=5)        |
| Ba/F3     | Parental + IL3         | > 10000 $\times/\pm$ 1.0 (n=7)       | > 10000 (n=1)                     |
| A431      | <i>EGFR</i> -amplified | > 10000 (n=1)                        | 3650 (n=1)                        |
| A549      | KRAS G12S              | > 8410 $\times/\pm$ 1.4 (n=15)       | > 9570 $\times/\pm$ 1.1 (n=6)     |

**Supplementary Figure S9. Further evidence for on-target activity of NVL-655.** Cell viability IC<sub>50</sub> shown as geometric mean  $\times/\pm$  standard deviation (number of repeats). IL3, interleukin 3.

**A**

## Potency against TRK

| Assay Modality           |                                  | Crizotinib              | Ceritinib                  | Alectinib                 | Brigatinib                | Ensartinib              | Lorlatinib               | Zotizakib                   | NVL-655                 |
|--------------------------|----------------------------------|-------------------------|----------------------------|---------------------------|---------------------------|-------------------------|--------------------------|-----------------------------|-------------------------|
| Biochemical              | TRKA IC <sub>50</sub>            | 18 nM<br>x/± 1.5 (n=5)  | > 3300 nM<br>(n=4)         | 371 nM<br>x/± 1.7 (n=5)   | 800 nM<br>x/± 2.0 (n=6)   | 21 nM<br>x/± 2.0 (n=6)  | 126 nM<br>x/± 1.5 (n=11) | 0.6 nM<br>x/± 1.0 (n=2)     | 155 nM<br>x/± 1.3 (n=4) |
|                          | TRKB IC <sub>50</sub>            | 12 nM<br>x/± 1.5 (n=7)  | > 3300 nM<br>(n=4)         | > 724 nM<br>x/± 1.7 (n=4) | > 3300 nM<br>(n=4)        | 15 nM<br>x/± 1.4 (n=5)  | 80 nM<br>x/± 1.6 (n=41)  | 0.3 nM<br>x/± 4.0 (n=4)     | 26 nM<br>x/± 1.8 (n=7)  |
|                          | TRKC IC <sub>50</sub>            | 14 nM<br>x/± 1.4 (n=4)  | > 1100 nM<br>(n=3)         | > 765 nM<br>x/± 1.9 (n=3) | > 3300 nM<br>(n=5)        | 20 nM<br>x/± 1.7 (n=4)  | 226 nM<br>x/± 1.6 (n=5)  | 0.2 nM<br>x/± 2.1 (n=4)     | 96 nM<br>x/± 1.4 (n=3)  |
| Cell Viability           | Ba/F3 TPM3-TRKA IC <sub>50</sub> | 80 nM<br>x/± 2.2 (n=5)  | 1180 nM<br>x/± 1.7 (n=3)   | 718 nM<br>x/± 3.0 (n=4)   | 2690 nM<br>x/± 1.5 (n=36) | 74 nM<br>x/± 2.5 (n=3)  | 156 nM<br>x/± 1.4 (n=64) | < 0.508 nM<br>x/± 1.0 (n=2) | 181 nM<br>x/± 1.8 (n=6) |
|                          | Ba/F3 ETV6-TRKB IC <sub>50</sub> | 84 nM<br>x/± 1.7 (n=5)  | 1410 nM<br>x/± 1.1 (n=3)   | 1800 nM<br>x/± 1.4 (n=3)  | 2640 nM<br>x/± 2.5 (n=4)  | 81 nM<br>x/± 1.7 (n=3)  | 248 nM<br>x/± 1.4 (n=81) | 0.9 nM<br>x/± 1.2 (n=5)     | 128 nM<br>x/± 1.5 (n=5) |
|                          | Ba/F3 ETV6-TRKC IC <sub>50</sub> | 102 nM<br>x/± 1.5 (n=4) | 706 nM<br>x/± 2.3 (n=2)    | 3560 nM<br>x/± 1.5 (n=5)  | 1260 nM<br>x/± 3.3 (n=2)  | 91 nM<br>x/± 1.7 (n=4)  | 439 nM<br>x/± 1.7 (n=4)  | < 0.5 nM<br>(n=4)           | 350 nM<br>x/± 1.4 (n=4) |
| Cellular phosphorylation | Ba/F3 TRKB IC <sub>50</sub>      | 312 nM<br>x/± 1.2 (n=4) | > 9190 nM<br>x/± 1.2 (n=4) | 6180 nM<br>x/± 1.3 (n=4)  | 3150 nM<br>x/± 2.0 (n=3)  | 241 nM<br>x/± 1.1 (n=3) | 727 nM<br>x/± 1.5 (n=10) | 1.8 nM<br>x/± 1.3 (n=2)     | 637 nM<br>x/± 1.1 (n=4) |

**B**

## Correlations across 3 TRKB Paralogs and 3 Assay Modalities

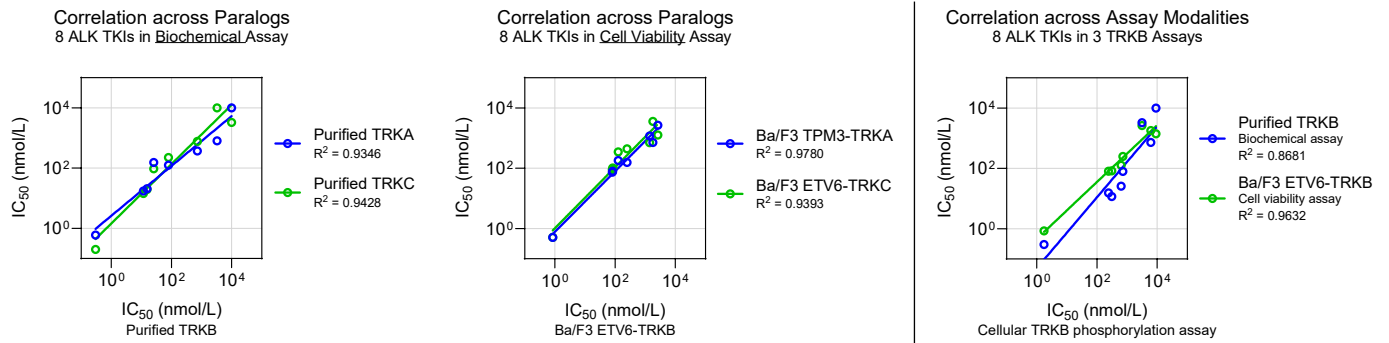**C**

## Lorlatinib Activity against ALK and TRK

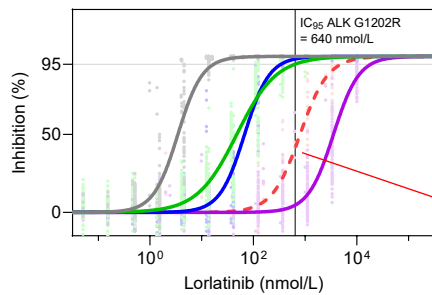

|                                                    | Infection (nmol/L) | Hill slope | Top  | Bottom | Inhibition at 640 nmol/L |
|----------------------------------------------------|--------------------|------------|------|--------|--------------------------|
| <b>Cell viability assay (Ba/F3 EML4-ALK v1)</b>    |                    |            |      |        |                          |
| ■ No mutations                                     | 3.5                | 1.84       | 100% | 0%     | 100%                     |
| ■ G1202R                                           | 48                 | 1.13       | 100% | 0%     | 95%                      |
| ■ L1196M                                           | 67                 | 1.81       | 100% | 0%     | 98%                      |
| ■ G1202R/L1196M                                    | 3542               | 1.77       | 100% | 0%     | 5%                       |
| <b>Cellular phosphorylation assay (Ba/F3 TRKB)</b> |                    |            |      |        |                          |
| ■ TRKB                                             | 800                | 1.61       | 100% | 0%     | 41%                      |

**D**

## NVL-655 Activity against ALK and TRK

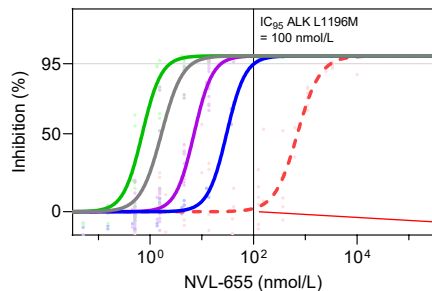

|                                                    | Infection (nmol/L) | Hill slope | Top  | Bottom | Inhibition at 100 nmol/L |
|----------------------------------------------------|--------------------|------------|------|--------|--------------------------|
| <b>Cell viability assay (Ba/F3 EML4-ALK v1)</b>    |                    |            |      |        |                          |
| ■ No mutations                                     | 1.7                | 2.13       | 100% | 0%     | 100%                     |
| ■ G1202R                                           | 0.7                | 2.36       | 100% | 0%     | 100%                     |
| ■ L1196M                                           | 30                 | 2.39       | 100% | 0%     | 95%                      |
| ■ G1202R/L1196M                                    | 7.1                | 2.43       | 100% | 0%     | 100%                     |
| <b>Cellular phosphorylation assay (Ba/F3 TRKB)</b> |                    |            |      |        |                          |
| ■ TRKB                                             | 704                | 1.98       | 100% | 0%     | 2%                       |

**Supplementary Figure S10. TRK activity.** **A**, IC<sub>50</sub> (nmol/L) against TRKA, TRKB, and/or TRKC in 3 assay modalities (biochemical, cell viability, and cellular phosphorylation assays) is shown as geometric mean  $\pm$  standard deviation (number of repeats). **B**, IC<sub>50</sub> correlations between 3 paralogs in the biochemical assay (left panel), between 3 paralogs in the cell viability assay (middle panel), and between 3 TRKB assays (right panel). Each dot represents a compound. Correlation coefficients ( $R^2$ ) are indicated. **C**, Dose-response plots of lorlatinib in ALK cell viability assays and TRKB cellular phosphorylation assays. All experimental repeats are plotted, and curves are fitted to the plotted data. Vertical line indicates IC<sub>95</sub> for ALK G1202R. The table lists the parameters for logistic regression and the percent inhibition of various targets at IC<sub>95</sub> ALK G1202R. **D**, Same as panel C but for NVL-655 with IC<sub>95</sub> for ALK L1196M.

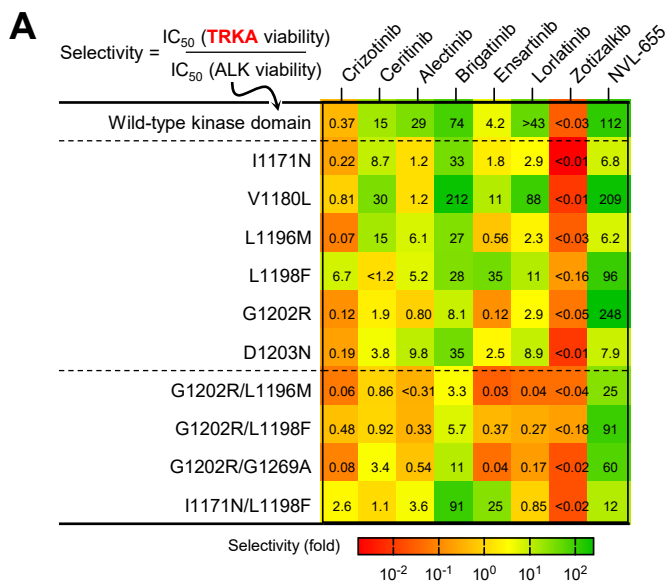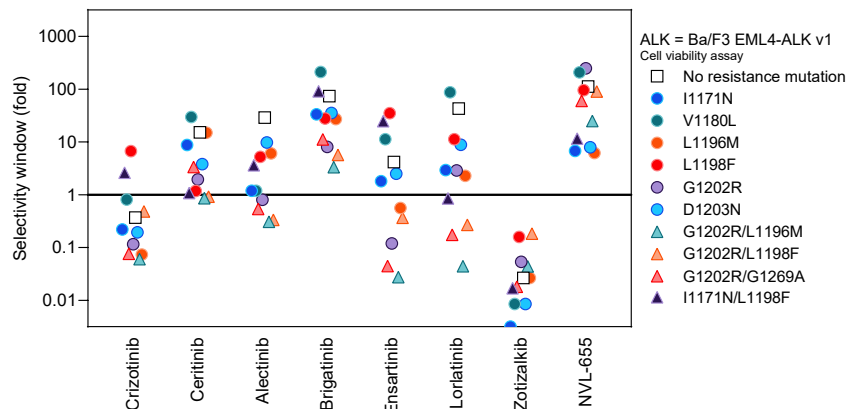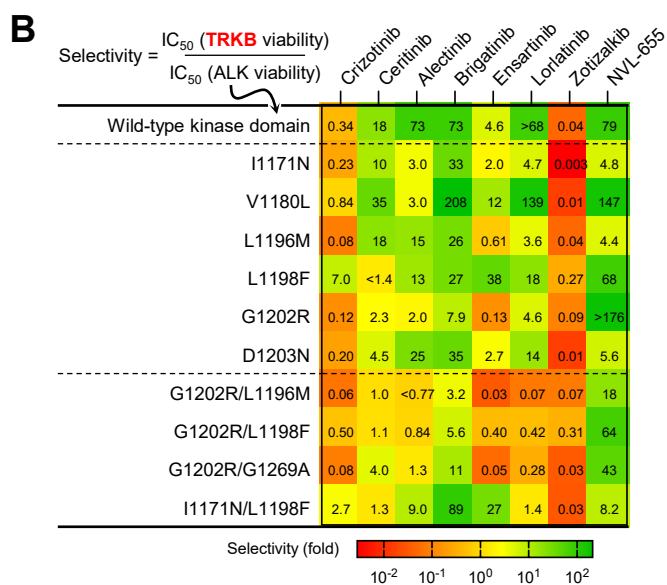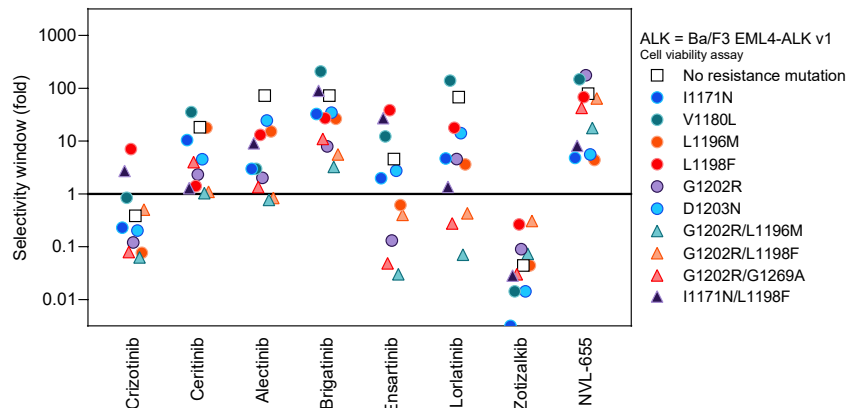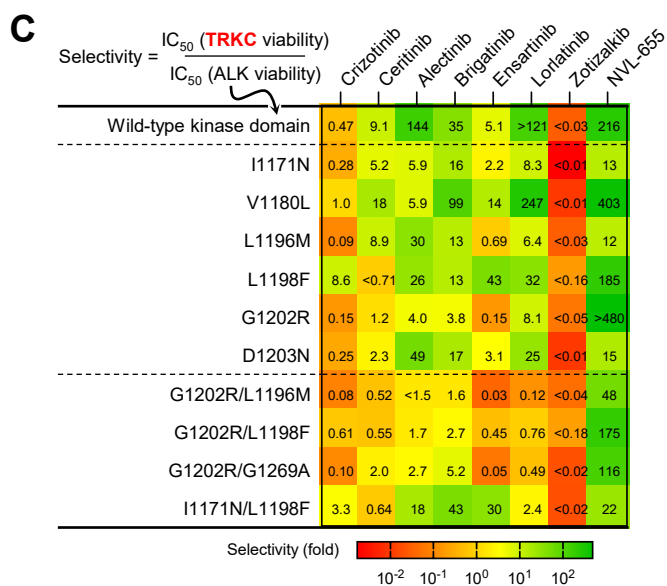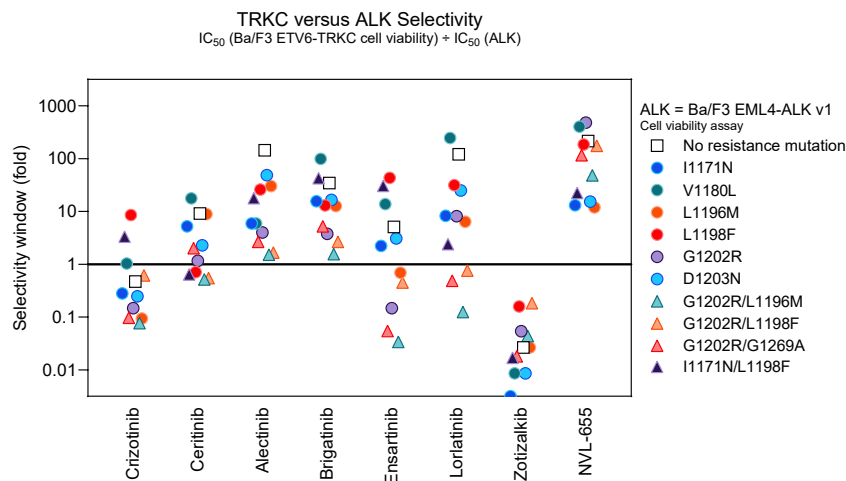

**Supplementary Figure S11. Selectivity for ALK versus TRK using additional assays.** **A**, (Left panel) Heat map showing the selectivity window calculated from Ba/F3 TPM3-TRKA IC<sub>50</sub> (Supplementary Fig. S10A) divided by the Ba/F3 EML4-ALK v1 IC<sub>50</sub> (Supplementary Fig. S4) in the cell viability assay. “Selectivity <” and “selectivity >” are treated as “selectivity =” for heat map coloring. (Right panel) Graphical representation of the heatmap. “Selectivity <” and “selectivity >” are treated as “selectivity =” for plotting. Horizontal line indicates ALK-TRK equipotency. **B–C**, Same as panel A, except with ETV6-TRKB (**B**) and ETV6-TRKC (**C**) instead of TPM3-TRKA.

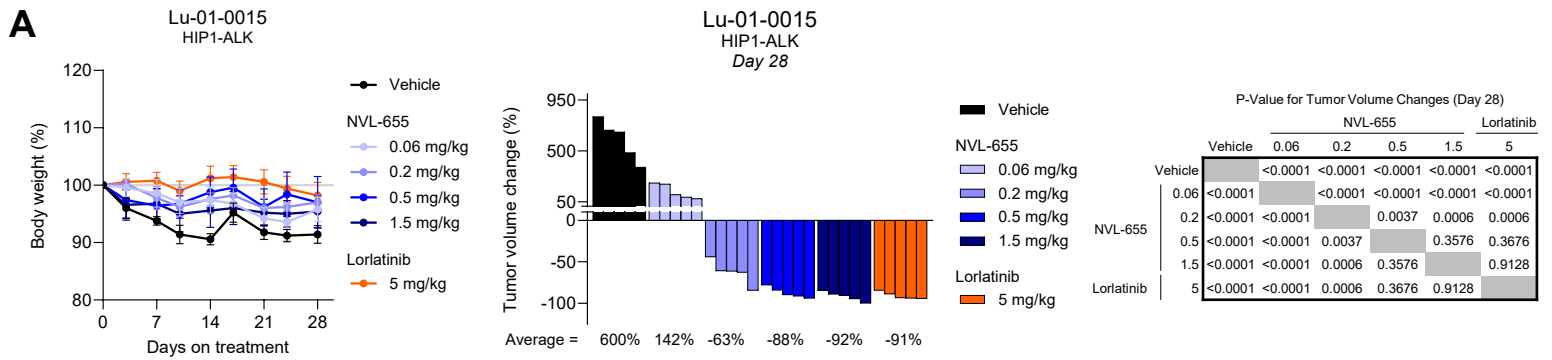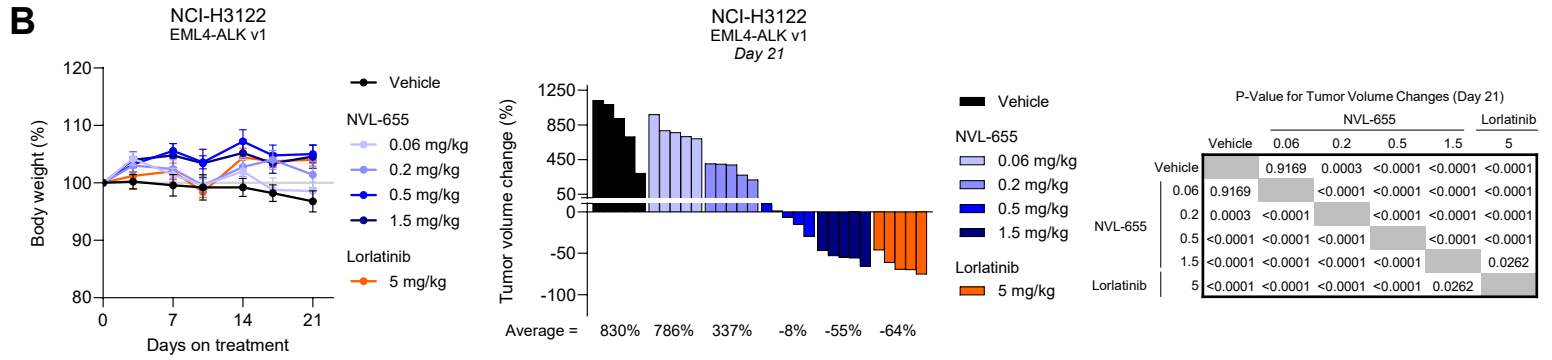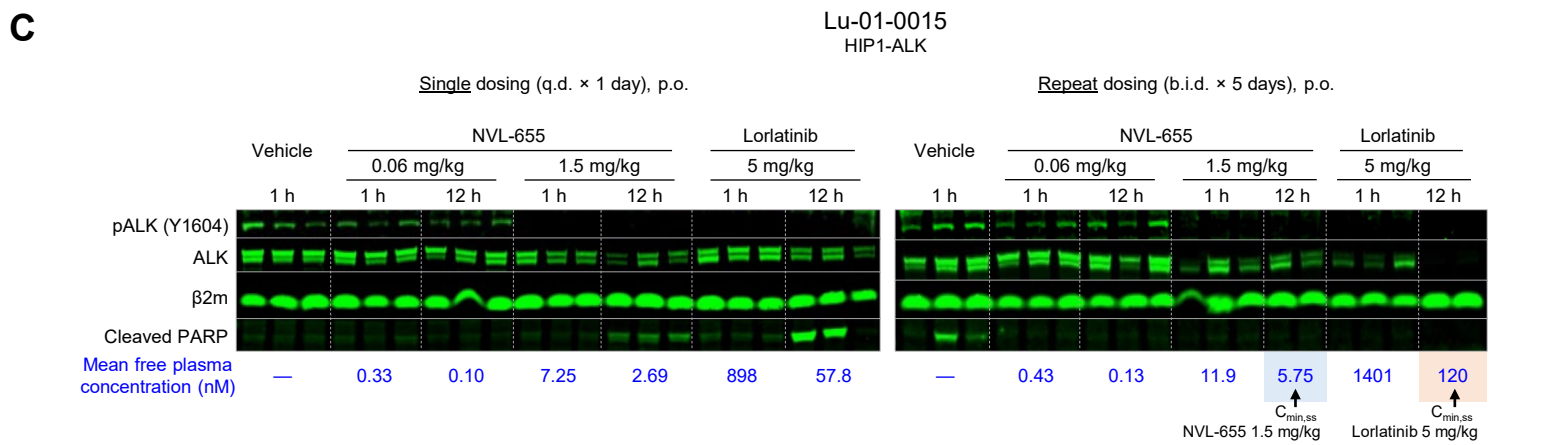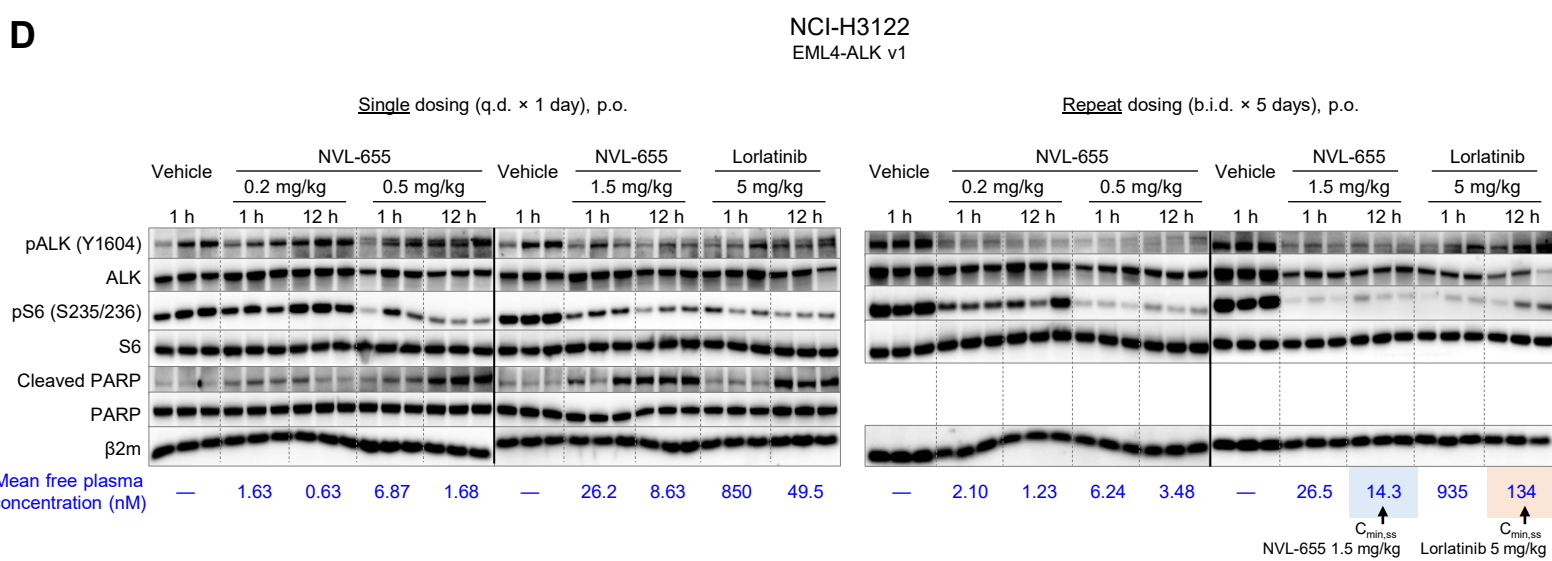

**Supplementary Figure S12. In vivo studies for ALK fusion with a wild-type kinase domain. A–B,** (Left) Body weight plotted as mean ± SEM. Horizontal gray line denotes the initial body weight (100%). (Middle) Waterfall plot showing tumor volume changes from day 0 to the final time point indicated. Average tumor volume changes are provided underneath. (Right) P-values for pairwise comparisons of tumor volume changes between the first day of treatment and the final timepoint indicated. Data for Lu-01-0015 (A) and NCI-H3122 (B) models. **C–D,** Western blot showing pharmacodynamic modulation in Lu-01-0015 (C) and NCI-H3122 (D) models. Compounds were administered as a single dose (q.d. × 1 day) or as short-term repeat doses (b.i.d. × 5 days). Plasma samples were collected at the indicated timepoints after the final dose to determine free drug concentrations indicated underneath. β2m serves as a loading control. Q.d., once per day; b.i.d., twice per day; p.o., orally administered; h, hour.

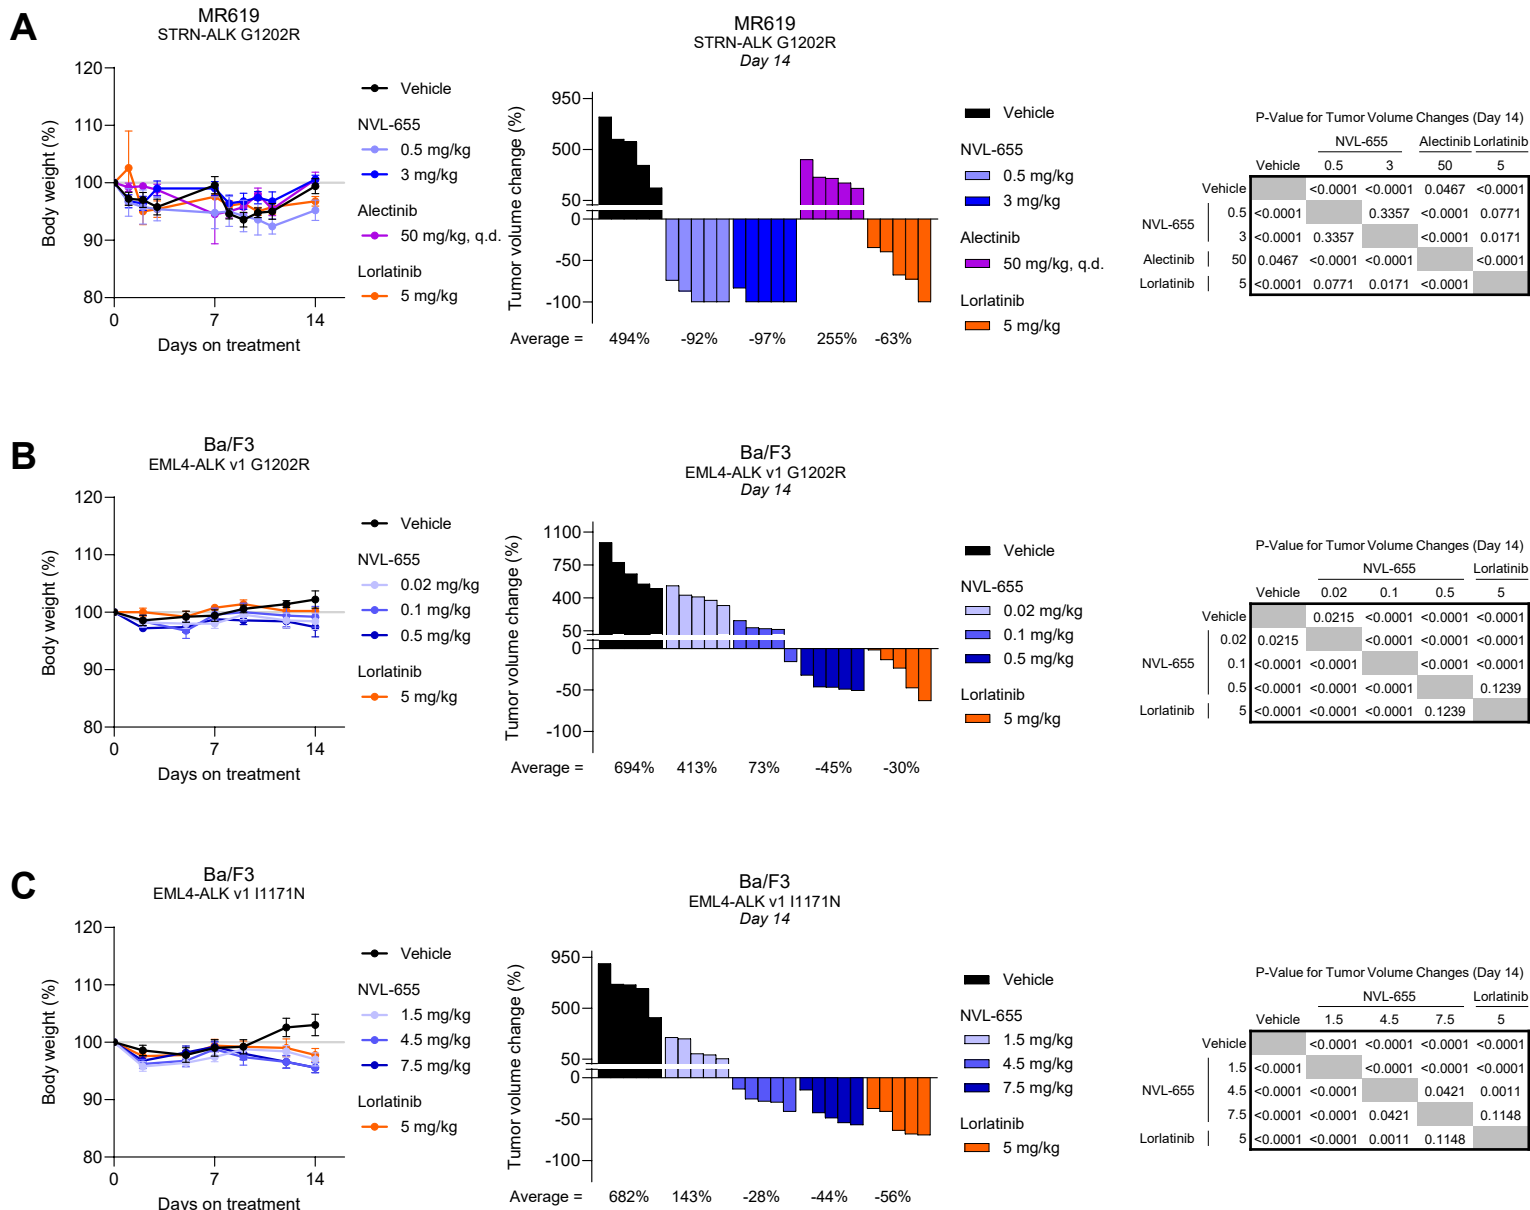

**Supplementary Figure S13. In vivo studies for ALK fusion with G1202R or I1171N single mutations. A–C,** (Left) Body weight plotted as mean  $\pm$  SEM. Horizontal gray line denotes the initial body weight (100%). (Middle) Waterfall plot showing tumor volume changes from day 0 to the final time point indicated. Average tumor volume changes are provided underneath. (Right) P-values for pairwise comparisons of tumor volume changes between the first day of treatment and the final timepoint indicated. Data for MR619 (A), Ba/F3 EML4-ALK v1 G1202R (B), and Ba/F3 EML4-ALK v1 I1171N (C) models.

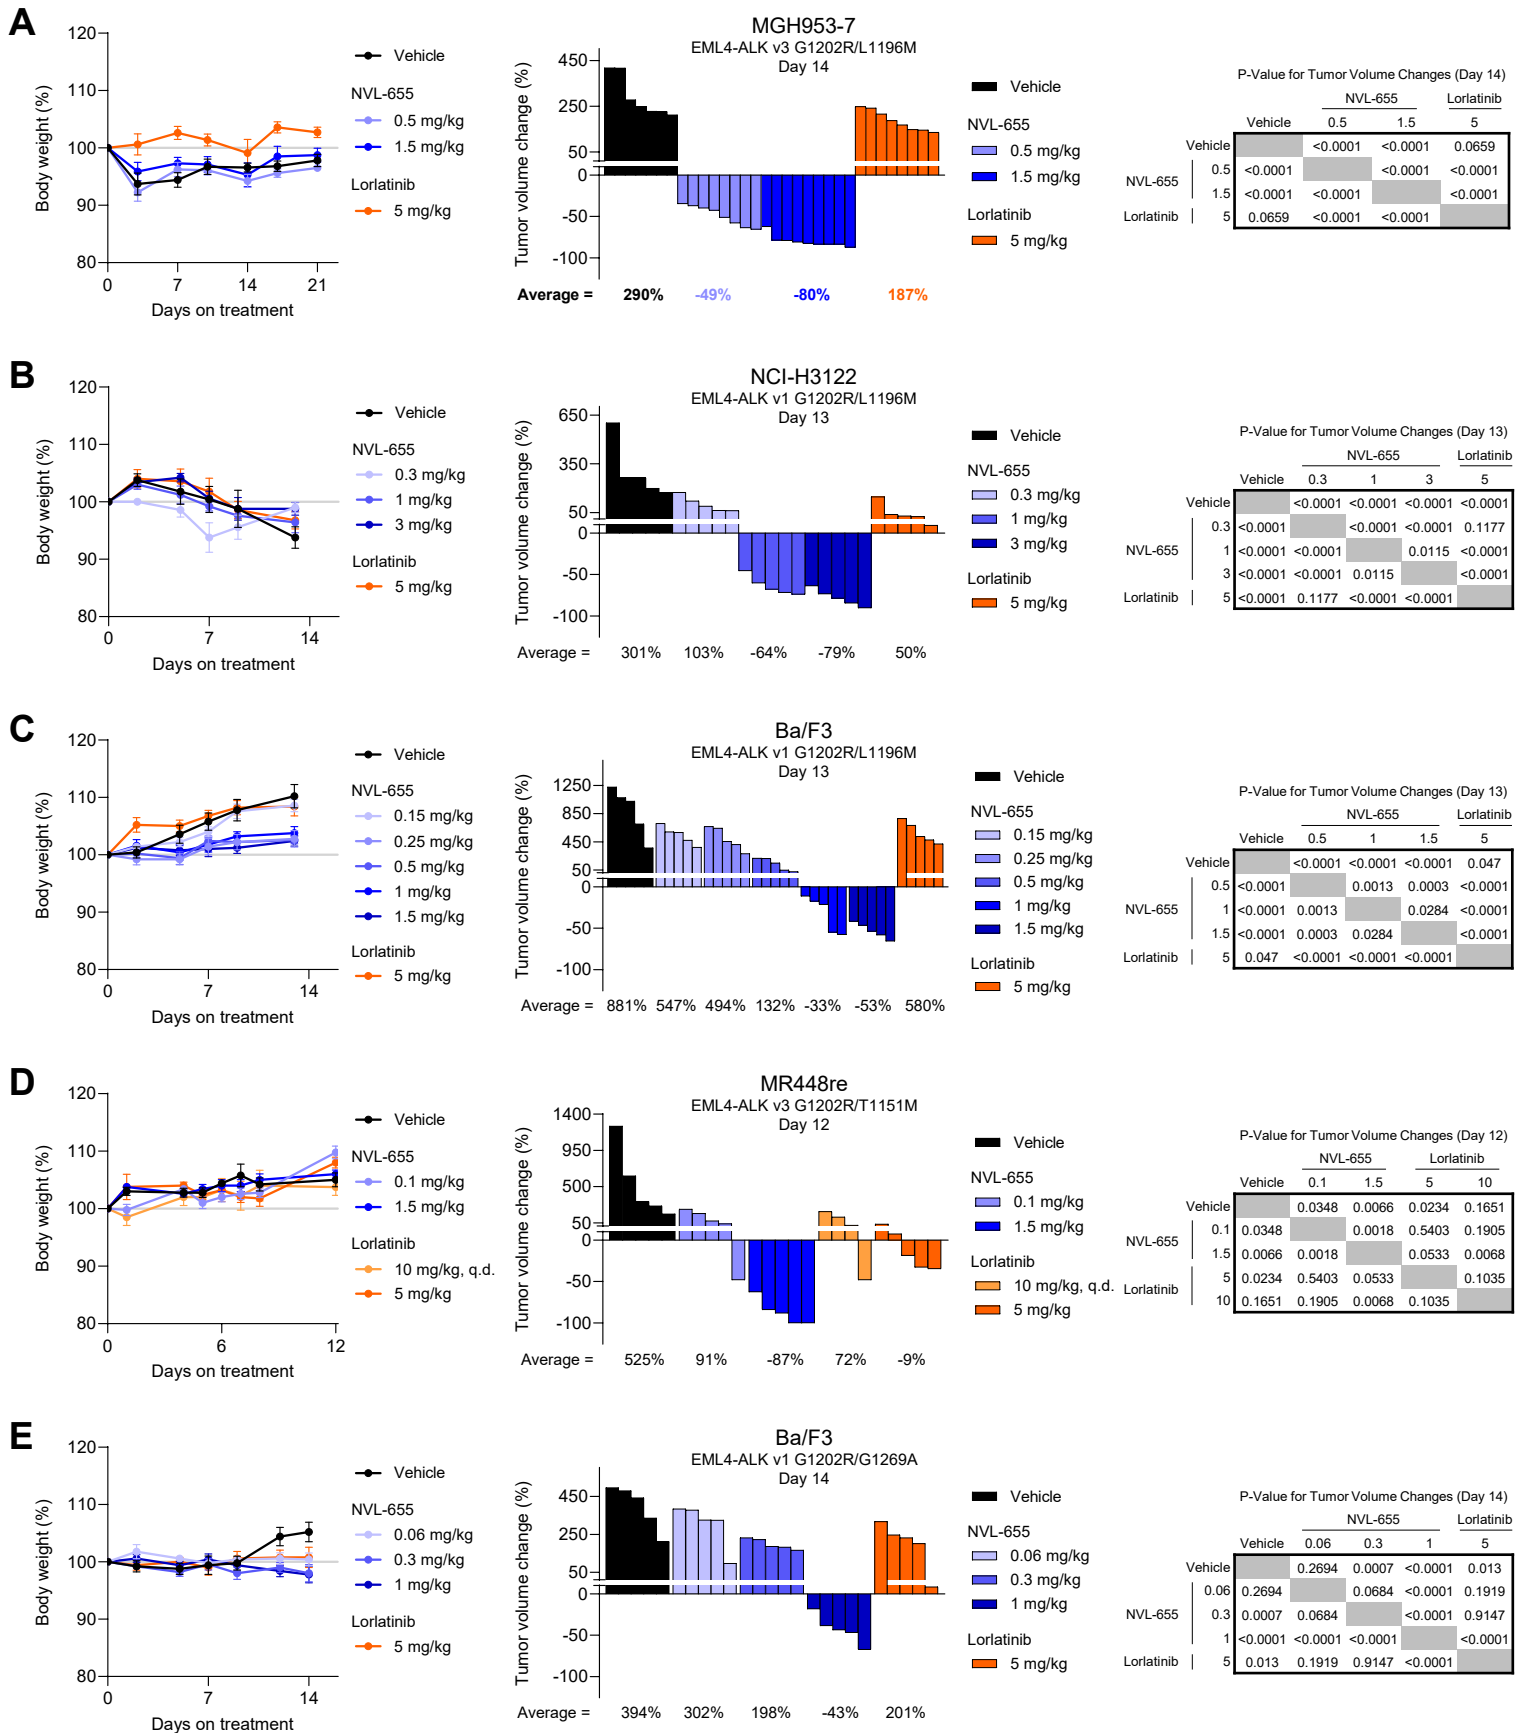

**Supplementary Figure S14. In vivo studies for ALK fusion with G1202R compound mutations. A–E,** (Left) Body weight plotted as mean  $\pm$  SEM. Horizontal gray line denotes the initial body weight (100%). (Middle) Waterfall plot showing tumor volume changes from day 0 to the final time point indicated. Average tumor volume changes are provided underneath. (Right) P-values for pairwise comparisons of tumor volume changes between the first day of treatment and the final timepoint indicated. Data for MGH953-7 (A), NCI-H3122 EML4-ALK v1 G1202R/L1196M (B), Ba/F3 EML4-ALK v1 G1202R/L1196M (C), MR448re (D), and Ba/F3 EML4-ALK v1 G1202R/G1269A (E) models.

**A**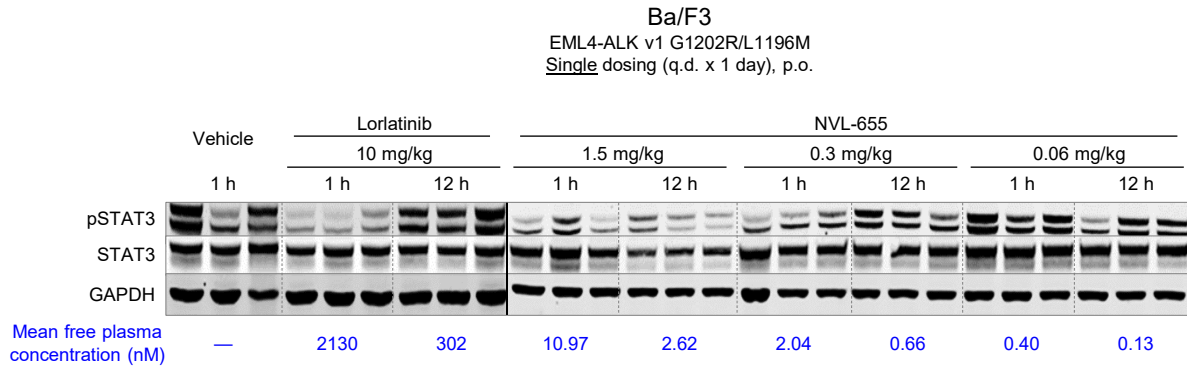**B**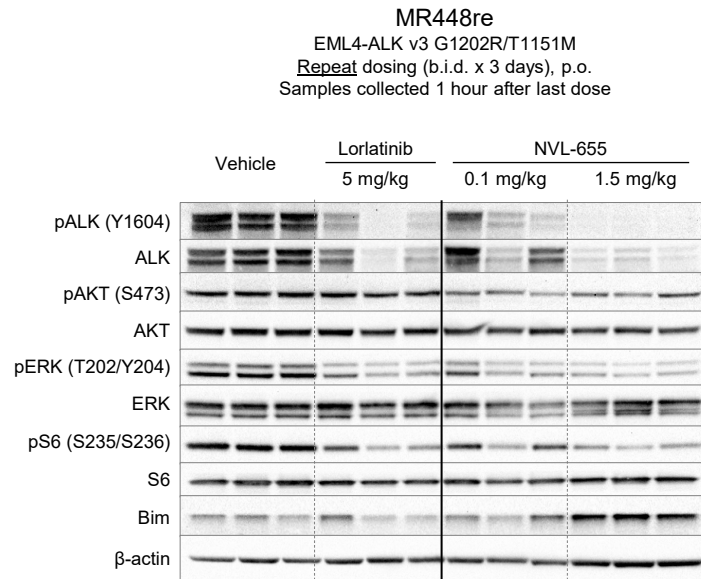

**Supplementary Figure S15. Pharmacodynamic analysis in G1202R compound mutation models. A–B,** Western blot showing pharmacodynamic modulation in Ba/F3 EML4-ALK v1 G1202R/L1196M (**A**) and MR448re (**B**) models. Compounds were administered as a single dose (q.d. × 1 day) or as short-term repeat doses (b.i.d. × 3 days). Plasma samples were collected at the indicated timepoints after the final dose to determine free drug concentrations indicated underneath. GAPDH and β-actin serve as loading controls. Q.d., once per day; b.i.d., twice per day; p.o., orally administered; h, hour.



**A**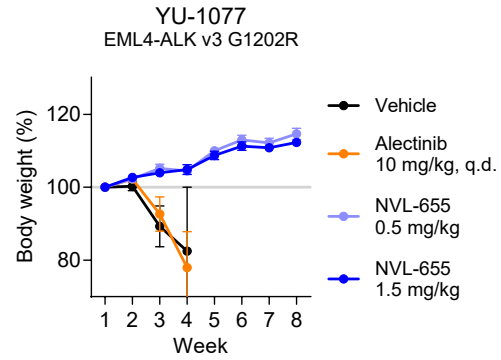**B**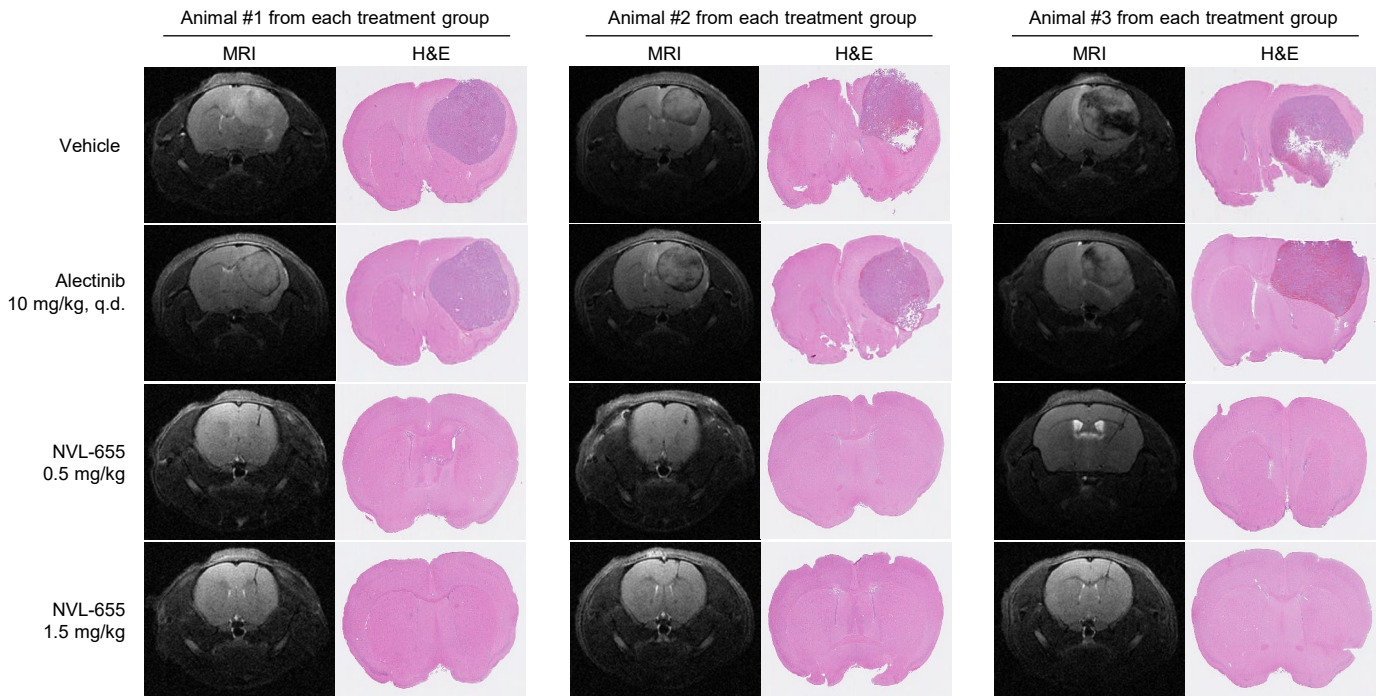

**Supplementary Figure S16. Body weight and H&E staining for the YU-1077 intracranial study.** **A**, Body weight plotted as mean  $\pm$  SEM. Horizontal gray line denotes the initial body weight (100%). **B**, Brain MRI and H&E staining analyses of mice treated for 3 weeks (n=3 per treatment group).

| Parameter                                                    | Lorlatinib                      | NVL-655                        |
|--------------------------------------------------------------|---------------------------------|--------------------------------|
| <b>Cellular phosphorylation assay (Ba/F3 TRKB)</b>           |                                 |                                |
| Inflection                                                   | 800 nmol/L                      | 704 nmol/L                     |
| Fraction unbound in 10% fetal bovine serum                   | 0.98                            | 0.32                           |
| Free inflection                                              | $800 \times 0.98 = 784$ nmol/L  | $704 \times 0.32 = 225$ nmol/L |
| Hill slope                                                   | 1.61                            | 1.98                           |
| Top                                                          | 100%                            | 100%                           |
| Bottom                                                       | 0%                              | 0%                             |
| <b>Human pharmacokinetics</b>                                |                                 |                                |
| Maximum plasma drug concentration                            | 577 ng/mL = 1420 nmol/L         | —                              |
| Fraction unbound in human plasma                             | 0.34                            | —                              |
| Maximum plasma free drug concentration                       | $1420 \times 0.34 = 483$ nmol/L | 40 nmol/L                      |
| Estimated TRKB inhibition                                    | <b>31%</b>                      | <b>3%</b>                      |
| <b>Mouse pharmacokinetics (1 h, 10 mg/kg orally, 1 dose)</b> |                                 |                                |
| Free plasma drug concentration                               | $2180 \pm 189$ nmol/L           | $27 \pm 2.7$ nmol/L            |
| Estimated TRKB inhibition                                    | <b>84%</b>                      | <b>1%</b>                      |

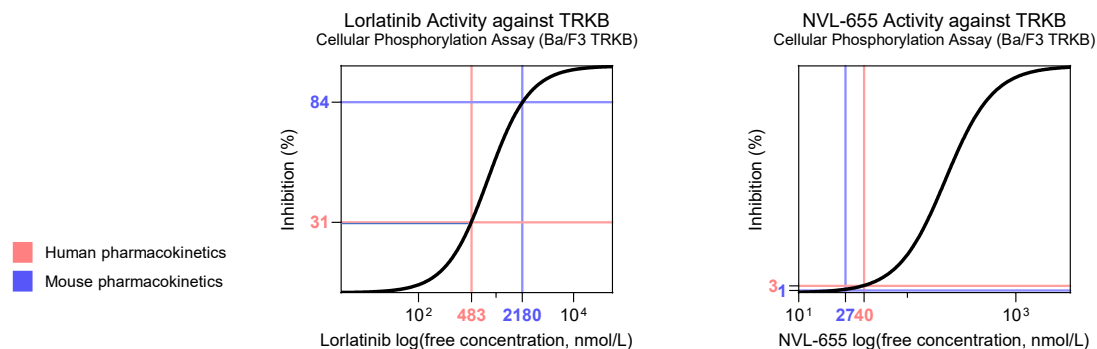

**Supplementary Figure S17. Estimating TRKB inhibition in humans and mice.** Four-parameter logistic equation was used to estimate TRKB inhibition using mouse and human pharmacokinetics data. The dose-response curves are identical to Supplementary Fig. S11C–D except that the concentration was adjusted by fraction unbound in 10% fetal bovine serum. Pharmacokinetics data represent the plasma free drug concentration at 1 hour after a single 10 mg/kg oral administration in mice or the maximum plasma free drug concentration in humans<sup>23,66</sup>.
